1  
2  
3  
4  
5  
6  
7  
8  
9  
10  
11  
12  
13  
14  
15  
16  
17  
18  
19  
20

## Structural variant evolution after telomere crisis

Dewhurst S.M<sup>1,\*</sup>, Yao X<sup>2,3,4\*</sup>, Joel Rosiene<sup>3,4</sup>, Huasong Tian<sup>3,4</sup>, Julie Behr<sup>2,3,4</sup>, Nazario Bosco<sup>1,5</sup>,  
Kaori K. Takai<sup>1</sup>, & de Lange T<sup>1,\*\*</sup> & Imielinski M<sup>3,4\*\*</sup>

<sup>1</sup> Laboratory of Cell Biology and Genetics, Rockefeller University, New York, USA

<sup>2</sup> Tri-Institutional Ph.D. Program in Computational Biology and Medicine, Weill Cornell Medicine,  
New York, USA

<sup>3</sup> Department of Pathology and Laboratory Medicine, Englander Institute for Precision Medicine,  
and Meyer Cancer Center, Weill Cornell Medicine, New York, USA

<sup>4</sup> New York Genome Center, New York, USA

<sup>5</sup> Present address: Department of Biochemistry and Molecular Pharmacology, Institute for  
Systems Genetics, NYU Langone Health, New York, USA

\* Equal contribution

\*\* Corresponding authors: [delange@rockefeller.edu](mailto:delange@rockefeller.edu), [mai9037@med.cornell.edu](mailto:mai9037@med.cornell.edu)

Lead contact: Marcin Imielinski

21 **Abstract**

22 Telomere crisis contributes to cancer genome evolution, yet only a subset of cancers display  
23 breakage-fusion-bridge (BFB) cycles and chromothripsis, hallmarks of previous experimental  
24 telomere crisis studies. We examine the spectrum of SVs instigated by natural telomere crisis.  
25 Spontaneous post-crisis clones from prior studies had both complex and simple SVs without  
26 BFB cycles or chromothripsis. In contrast, BFB cycles and chromothripsis occurred in clones  
27 that escaped from telomere crisis after CRISPR-controlled telomerase activation in MRC5  
28 fibroblasts. This system revealed convergent evolutionary lineages altering one allele of 12p,  
29 where a short telomere likely predisposed to fusion. Remarkably, the 12p chromothripsis and  
30 BFB events were stabilized by independent fusions to 21. Telomere crisis can therefore  
31 generate a wide spectrum of SVs, and lack of BFB patterns and chromothripsis does not  
32 indicate absence of past crisis.

33

34

35

36

37

38 Structural variation is a hallmark of cancer genomes. Recent pan-cancer whole genome  
39 sequencing (WGS) studies have begun to reveal a more complete picture of the spectrum of  
40 structural variants (SVs) found in cancer genomes, ranging from simple deletions, duplications  
41 and translocations to complex and often multi-chromosomal rearrangements<sup>1-3</sup>. The PCAWG  
42 consortium catalogued WGS variants across >2,500 cases spanning 38 tumor types<sup>4</sup> to  
43 nominate novel classes of complex SVs and cluster these into signatures, mirroring previous  
44 work in the categorization of single nucleotide variants (SNVs) into distinct mutational  
45 processes<sup>5-8</sup>. The analysis of genome graphs provides a rigorous and unified framework to  
46 classify simple and complex SVs (including chromothripsis, breakage-fusion-bridge (BFB)  
47 cycles, and double minutes), nominate novel event classes, and study the rearranged structure  
48 of aneuploid alleles<sup>3</sup>.

49

50 However, despite advances in the identification and classification structural variations, a  
51 mechanistic understanding of the underlying causes is often still lacking. SV mutational  
52 processes may have a more complex etiology than those driving the formation of SNVs and  
53 generate a more complex spectrum of patterns: layers of simple SVs can reshape a locus  
54 gradually and across multiple alleles, and complex SVs can rapidly rewire many genomic  
55 regions. In addition, multiple underlying causes can lead to the same type of rearrangement,  
56 and diverse outcomes can originate from a single cause. Further, it has been expensive and  
57 technically challenging to delineate specific mechanisms, although some progress has been  
58 made<sup>9-14</sup>.

59

60 Telomere crisis, which is thought to occur at an early stage of carcinogenesis before a telomere  
61 maintenance mechanism is activated<sup>15</sup>, has been nominated as a cause of cancer genome SVs.  
62 *A priori*, the genomic consequences of telomere crisis are predicted to be profound: critically  
63 short telomeres in human cells can trigger a DNA damage response, and inappropriately  
64 engage DNA repair pathways resulting in telomere to telomere fusions<sup>16,17</sup>. Subsequent cell  
65 divisions in the presence of fused chromosomes has long been considered a mechanism driving  
66 complex chromosomal rearrangements such as BFB cycles in tumors<sup>18,19</sup>. The characteristic  
67 fold-back inversions of BFB cycles are known to contribute to tumorigenesis in ALL<sup>20</sup> as well as  
68 squamous cell cancers and esophageal adenocarcinoma<sup>3</sup>. Modeling of telomere crisis in late  
69 generation telomerase-deficient mice lacking p53 showed that telomere dysfunction engenders  
70 cancers with non-reciprocal translocations, as well as focal amplifications and deletions in

71 regions relevant to human cancers<sup>21,22</sup>. Furthermore, mouse models of telomerase reactivation  
72 after a period of telomere dysfunction showed that acquisition of specific copy number  
73 aberrations and aneuploidy could drive malignant phenotypes<sup>23</sup>.

74  
75 Studies in cultured human cells have also illuminated the genomic consequences of telomere  
76 dysfunction. Even a single artificially deprotected telomere can fuse with multiple intra- and  
77 inter-chromosomal loci leading to complex fusion products<sup>24</sup> but it is unclear whether these  
78 complex rearrangements are compatible with escape from telomere crisis. The resolution of  
79 dicentric chromosomes induced by over-expression of a dominant negative allele of the  
80 telomere binding protein TRF2 can lead to the dramatic chromosome re-shuffling phenomenon  
81 of chromothripsis<sup>11,14,25</sup>. However, to date the only study directly investigating the consequences  
82 of a sustained period of telomere dysfunction failed to identify any complex rearrangements in  
83 wild-type HCT116 colon carcinoma cells<sup>26</sup>. This may be because these cells readily escaped  
84 from the telomere dysfunction induced by expression of a dominant-negative hTERT  
85 (telomerase reverse transcriptase) allele. In HCT116 cells with defective Non-Homologous End  
86 Joining (NHEJ) pathways, which are already genetically unstable, complex chained SVs were  
87 observed after telomere dysfunction, but the relevance of these types of rearrangements to  
88 human cancer remains unclear<sup>26</sup>.

89  
90 Given the expanding repertoire of structural variation present in so many cancer types, and the  
91 potential contribution of telomere dysfunction to many of these different aberrations, we set out  
92 to characterize the extent and type of structural variation that can be unleashed by telomere  
93 crisis and subsequent genome stabilization by telomerase expression. We approached this  
94 problem in two ways. First, we performed whole genome sequencing (WGS) on a panel of  
95 seven previously isolated cell lines that had escaped telomere crisis spontaneously through  
96 telomerase activation. Secondly, we created a controlled *in vitro* telomere crisis system by  
97 engineering an MRC5-derived cell line in which telomerase could be activated during telomere  
98 crisis and analyzed the resulting post-crisis clones by WGS. The results indicate that the  
99 consequences of telomere crisis are varied and not readily predictable. In many instances, the  
100 post-crisis genomes did not feature BFB cycles or chromothripsis. Therefore, telomere crisis  
101 may have occurred in cancers that lack these genomic scars of telomere dysfunction.

102

103



104 **Results**

105

106 **Genomic complexity after spontaneous telomerase activation**

107 In order to determine the SVs in post-telomere crisis genomes, we examined seven SV40 large  
108 T-transformed cell lines that had undergone spontaneous telomerase activation after passage  
109 into telomere crisis (Supplementary Table 1, Supplementary Figure 1). The cell lines represent  
110 independent immortalization events in a variety of cell lineages<sup>27-29</sup>. We carried out whole  
111 genome sequencing of these cell lines to a median depth of 41X (range: 17-55) and generated  
112 junction balanced genome graphs<sup>3</sup> via JaBbA from SvABA<sup>30</sup> and GRIDSS<sup>31</sup> junction calls (see  
113 Methods). All genomes demonstrated some level of aneuploidy but there was a high variance in  
114 the total number of junctions fit across each genome, ranging from 7 to 100. Analysis of  
115 junction-balanced genome graphs<sup>3</sup> revealed complex multi-chromosomal gains in four of seven  
116 samples, with the remaining three lines harboring only broad arm level losses (Figure 1A).

117

118 Strikingly, genome graph-based categorization of complex SVs<sup>3</sup> did not identify the classic  
119 footprints of chromothripsis or BFB cycles in these genomes. However, several amplified  
120 subgraphs were associated with stepwise copy number gains reminiscent of BFB cycles (Figure  
121 1A-B, Supplementary Figure 1). The majority of copy changes in these subgraphs could not be  
122 attributed to fold-back inversion junctions (a hallmark of BFB cycles) but were instead driven by  
123 a spectrum of duplication and translocation-like junctions and templated insertion chains. These  
124 patterns are exemplified in a 10 Mbp region of 20q of BFT3B that is amplified to 10-15 copies,  
125 incorporating Mbp scale fragments of chromosomes 5p, 8q, 10q, as well as 19p at lower copy  
126 number (Figure 1B). Of note, six of seven cell lines showed modest increases in *TERT* copy  
127 number, providing a possible genomic basis for telomere crisis escape (Figure 1C). Among  
128 these, the four cell lines harboring the most complex genome graphs had the highest *TERT*  
129 copy number, although *TERT* was not among the most complex or highly amplified loci in these  
130 lines. Across seven different transformed cell lines, spontaneous escape from telomere crisis  
131 was associated with a highly variable spectrum of SV patterns comprising complex and non-  
132 canonical patterns of amplification and numerical gains and losses, including some affecting  
133 *TERT*.

134

135

136

137 **An *in vitro* system for telomerase-mediated escape from natural telomere crisis**

138 To gain a clearer insight into the nature of SVs that arise during telomere crisis, we developed  
139 an *in vitro* system in which we could reproduce telomere crisis and generate a high number of  
140 post-crisis clones. MRC5 human lung fibroblasts were chosen to model telomere crisis since  
141 they have a well-defined *in vitro* replicative potential determined by telomere attrition. To bypass  
142 senescence, the Rb and p21 pathways were inactivated by infecting the population of MRC5  
143 cells with a retrovirus bearing shRNAs targeting the respective transcripts (Supplementary  
144 Figure 2A). This population of MRC5/Rbsh/p21sh was then endowed with an inducible CRISPR  
145 activation system (iCRISPRa) to activate the *TERT* promoter (Supplementary Figure 2B). The  
146 iCRISPRa system employed a doxycycline-inducible nuclease-dead Cas9 fused to a tripartite  
147 transcriptional activator (VP64-p65-Rta)<sup>32</sup> and four gRNAs targeting the *TERT* promoter (Figure  
148 2A, Supplementary Figure 2B). Addition of doxycycline (dox) to MRC5/Rbsh/p21sh/iCRISPRa-  
149 *TERT* cells resulted in robust induction of *TERT* mRNA within 96 hours, whereas without dox,  
150 *TERT* transcripts are undetectable in this cell line ( $p < 0.001$ , Figure 2B). A similar dox-induced  
151 increase in mRNA expression was noted upon introduction of sgRNAs to a control gene  
152 (Supplementary Figure 2C). Induction of telomerase activity was readily detectable in a TRAP  
153 (telomerase repeated amplification protocol) assay (Figure 2C). However, the induced *TERT*  
154 mRNA levels and the TRAP activity were significantly lower than in telomerase-positive control  
155 cell lines. The relatively weak telomerase activity in this system harmonizes with recent work  
156 showing that *TERT* promoter mutations initially result in low levels of telomerase activity that is  
157 not sufficient to maintain bulk telomere length<sup>33</sup>.

158  
159 At approximately 120 days after the start of the experiment (55 days with dox) the  
160 MRC5/Rbsh/p21sh/iCRISPRa-*TERT* population was proliferating faster than their untreated  
161 counterparts (Figure 2D). Inspection of individual telomere lengths using Single Telomere  
162 Length Analysis (STELA<sup>34</sup>) revealed that although telomerase expression was sufficient to allow  
163 the cells to proliferate, it was not sufficient to maintain bulk telomere length (Figure 2E). After  
164 150 days of continuous culture, the majority (86%) of XpYp telomeres in induced  
165 MRC5/Rbsh/p21sh/iCRISPRa-*TERT* cells were between 1-4 kb compared to 40% in uninduced  
166 cells (Figure 2F, Supplementary Figure 2D). Consistent with this, genomic blotting showed bulk  
167 telomere shortening in both induced and uninduced cells (Figure 2G). These telomere dynamics  
168 are consistent with the expectation that in the culture without telomerase, cells with critically  
169 short telomeres will preferentially be lost, leading to a surviving population with relatively longer  
170 telomeres. In contrast, cells in the induced culture with (low) telomerase activity have the ability

171 to elongate the shortest telomeres. As a result, the induced cells will tolerate telomere attrition  
172 better and present with overall shorter telomeres at later time points.

173

#### 174 **Dissipating telomere crisis in MRC5/Rbsh/p21sh/iCRISPRa-TERT cells**

175 To confirm that the MRC5/Rbsh/p21sh/iCRISPRa-TERT cells experienced telomere crisis  
176 before the induction of telomerase increased their proliferation rate, we investigated cells at  
177 various time points from the start of the experiment (Figure 2D). Metaphase spreads showed  
178 both induced and uninduced MRC5/Rbsh/p21sh/iCRISPRa-TERT cells contained dicentric and  
179 multicentric chromosomes (Figure 3A) and genomic blots showed high molecular weight  
180 telomere bands consistent with fused telomeres (Figure 2G). As expected from the ability of  
181 telomerase to counteract the formation of critically short telomeres, at 125 days after the start of  
182 the experiment, induced cells had significantly fewer fusions than untreated cells (21% vs. 40%,  
183  $p < 0.05$ , Figure 3B, Supplementary Figure 3A). PCR-mediated detection of fusions between the  
184 Tel Bam 11 family of telomeres<sup>35,36</sup> confirmed these dynamics (Figure 3C). Quantification of the  
185 fusion frequency showed a significant reduction in number of fusions per haploid genome in the  
186 induced population (day 110,  $p < 0.01$ , Figure 3D). Consistent with telomerase-mediated genome  
187 stabilization, there was a trend towards a lower level of 53BP1-marked DNA damage foci at  
188 later time points (Figure 3E-F) and the percentage of cells with micronuclei (an indicator of  
189 genome instability) was significantly reduced at day 110 ( $p < 0.05$ , Figure 3G). Taken together,  
190 these data indicate that after a period of genomic instability induced by critically short telomeres,  
191 iCRISPRa-mediated telomerase activation is sufficient to stabilize the genome and allow the  
192 MRC5/Rbsh/p21sh/iCRISPRa-TERT cells to escape from telomere crisis.

193

#### 194 **Genomic screening of post-crisis clones**

195 To assess the genome structure of proliferating post-crisis cells, single cell clones were isolated  
196 from induced MRC5/Rbsh/p21sh/iCRISPRa-TERT cells at day 120 ('Y clones') and day 150 ('Z  
197 clones') (Figure 4A). The clonal yield at day 150 was greater than at day 120 in induced cells  
198 but no clones could be isolated from the uninduced population at either timepoint. The lower  
199 clonal yield at day 120 may be due to incomplete stabilization of the telomeres since clones  
200 from this time-point showed a higher burden of fused telomeres than those derived from day  
201 150 (Supplementary Figure 4A). Post-crisis clones from both timepoints showed evidence of  
202 ultra-short telomeres and reduced telomere length (Supplementary Figure 4B-C). Telomerase  
203 activity in post-crisis clones was comparable to the parental induced population, indicating that  
204 clone viability was not due to selection for increased telomerase activity (Supplementary Figure

205 Figure 4D). To generate control clones which had not passed through a period of telomere  
206 crisis, early passage MRC5 cells were infected with a retrovirus expressing hTERT and single  
207 cell clones were isolated (Supplementary Figure 4E). Genome profiling with low pass (~5X)  
208 WGS was performed on eight hTERT-expressing control clones (CT clones), 36 Y clones from  
209 day 120, and 82 Z clones from day 150 (Table S2).

210

211 Analysis of genome-wide read depth across 118 Y and Z clones demonstrated predominantly  
212 diploid genomes with a striking enrichment of clones with DNA loss on most of chromosome  
213 12p (63%, 74/118, Figure 4B). Within the other 44 samples, we observed a subset of clones  
214 (5%, 6/118) with gains of chromosome 21q. As expected, control CT clones showed no  
215 evidence of SVs or copy number variants (Supplementary Figure 4F). Hierarchical clustering of  
216 all clones by their coverage on chromosomes 12p and 21q revealed six distinct clusters (Figure  
217 4C). A minority of clones were diploid on chromosomes 12 and 21 and elsewhere in the  
218 genome and are therefore designated as 'unrearranged' (32% of clones, 38/118). Of note, the  
219 unrearranged group was enriched in day 120 samples ( $P = 1.79 \times 10^{-9}$ , odds ratio 14.7, Fisher's  
220 exact test, Figure 4C), suggesting that these clones may not have experienced crisis prior to  
221 telomerase induction. The cluster of clones with 21q gain were diploid on 12p.

222

223 The remaining 74 clones (63%) all showed a heterogenous pattern of copy number alterations  
224 targeting 12p (Figure 4C). First, a singular pattern of distinct interspersed losses that resembled  
225 chromothripsis was present in one clone (0.8%, 1/118). Another cluster of 6 clones  
226 demonstrated complete loss of 12p ('arm loss', 5%, 6/118). The other 67 clones all share a  
227 breakpoint near the distal end of 12p and a large deletion starting ~9 Mbp from the centromere.  
228 These clones were differentiated into two clusters by the presence or absence of an  
229 amplification around 8~9 Mbp from the 12p telomere. In the 47 clones that contained this  
230 amplification, by aggregating a consensus read depth profile we observed stepwise gains at the  
231 distal end of 12p, a pattern reminiscent of BFB cycles (Supplementary Figure 5A). This cluster  
232 was therefore labelled 'BFB-like', a designation which is further supported by data presented  
233 below. The 20 clones (17%) that lack the amplicon around 8-9 Mbp harbored varying  
234 boundaries of the shared larger deletion, and based on the analysis described below we  
235 designate these as 'early BFB-like'. In summary, these low-pass WGS copy number profiles  
236 indicated a limited set of distinct lineages surviving telomere crisis, with at least two lineages  
237 independently converging on chromosome 12.

238

## 239 **High-resolution reconstruction and lineage of post-crisis genomes**

240 To gain further insight into structural variant evolution along these lineages, we chose 15  
241 representative clones spanning the 5 clusters with rearrangements involving 12p for high-depth  
242 WGS to a median read depth of 50X (range: 30-88). Phylogenies derived from genome-wide  
243 SNV patterns demonstrated a median branch length of 551 SNVs (range: 9-2,409), a low  
244 mutation density (<1 SNV/Mbp) that is consistent with previous WGS studies of clones in cell  
245 culture<sup>37</sup>. This analysis revealed four major clades (Figure 5A). These clades had good  
246 concordance with copy number alteration and rearrangement junction patterns in the same 12p  
247 region, suggesting these clones represent distinct post-crisis evolutionary lineages (Figure 5B).

248  
249 In order to further reconcile the shared and distinct rearrangement junctions present in the  
250 evolution of these clones, we carried out local assembly of rearrangement junctions and junction  
251 balance analysis (see Methods<sup>3</sup>), which revealed 7 distinct junction-balanced genome graphs  
252 spanning 12p (Figure 5C). With the exception of the chromothriptic lineage (see below), each of  
253 these distinct lineages was represented by more than one post-crisis clone. We then applied  
254 gGnome to infer a set of linear alleles parsimoniously explaining the different genome graph  
255 patterns<sup>3</sup> (see Methods, Figure 5C).

256  
257 Analyzing the clonal evolution of these rearranged 12p alleles, we identified 8 clones  
258 demonstrating progressive stages of a BFB cycle. This complex variant evolved after a long-  
259 range inversion junction (j1) joined a distal end of 12p to its peri-centromere. This junction was  
260 followed by subsequent fold back inversion junctions (j2, j3, j4), clustered at the 8-9 Mbp focus  
261 on 12p, which are present in two different sets of post-crisis clones (Early BFB, BFB, Figure  
262 5C). The earliest of the fold-back inversion junctions (j2) in the BFB lineage was associated with  
263 a cluster of 3 G or C mutations within 2 kbp of each other, consistent with APOBEC-mediated  
264 mutagenesis<sup>25</sup> (Supplementary Figure 5B). The most complex locus in the BFB lineage (Z43,  
265 Late BFB, Figure 5C), contained six variant junctions in *cis*, including two late tandem  
266 duplications (j5, j6). Although j6, which connects the distal portion 12p to the 12p centromere,  
267 was not directly observed in the short read WGS data, it was imputed (dashed line, j6, Figure  
268 5C) to resolve the duplication of j1 in clone Z43, as well as two allelic ends in the genome  
269 graph. Remarkably, the vast majority (97%) of SNVs detected in this BFB lineage (Figure 5A)  
270 were either shared or private, indicating that these stages of BFB evolution occurred rapidly in  
271 the history of the experiment.

272

273 We confirmed a chromothripsis event in an independent lineage (Y8), which lacked j1 and all  
274 subsequent junctions of the BFB lineage, further supporting the idea that this is an independent  
275 lineage (Figure 5C). Integration of SCNA data with the SNV phylogeny showed clones from the  
276 unrearranged lineage (Y1 and Y4) and one of the 12p arm loss clones (Y11) to be mutationally  
277 distant (>2,000 SNVs) from the chromothripsis (Y8) and BFB lineages, which shared over 1,583  
278 SNVs (Figure 5A). Supporting this, a small (~21.5 Kbp) simple deletion junction was shared  
279 across Y8, Y15, and all the BFB lineage samples, yet was absent in Y11 (Supplementary Figure  
280 5C).

281

282 This comparison established that the 12p loss in Y11 could not have occurred after j1, and  
283 indicates that a second independent arm loss must have given rise to Y15. Interestingly, the  
284 Y15 arm loss clone was clustered in the BFB/Y8 clade in the SNV phylogeny, sharing 30 SNVs  
285 with the BFB lineage which it did not share with Y8 (Figure 5A). This indicates that the 12p arm  
286 loss in Y15 may have arisen either before or after j1. Although the breakpoints of the Y11 and  
287 Y15 arm losses could not be mapped due to their location in the 12 centromeric region, based  
288 on the SNV phylogeny, they likely represent distinct events. Taken together, these results  
289 support a model whereby at least three lineages independently rearranged a previously wild  
290 type 12p during telomere crisis (Figure 5C). Our data appear to have captured sequential steps  
291 in the formation of an increasingly complex BFB-like event. Each of these stages must  
292 represent a stabilized allele since the post-crisis lines are clonal, and multiple clones share the  
293 same rearrangement junctions (Figure 5B). This necessarily raises the question as to what  
294 caused the on-going instability, and how and where these complex alleles are terminated.

295

296

### 297 **Resolution of BFB cycles in telomere crisis**

298 Analysis of junction-balanced genome graphs allows for the nomination of 'loose ends' (or allelic  
299 ends), representing copy number changes that cannot be resolved through assembly or  
300 mapping of short reads. We identified three distinct loose ends across the 4 variant graphs  
301 spanning the 8 clones in the BFB lineage (Figure 5C, Supplementary Figure 5D). Each of these  
302 loose ends were placed at the terminus of their respective reconstructed allele, and we posit  
303 they represent the new 'ends' of the derivative alleles of the BFB lineage. Distinct ends for each  
304 of these rearranged lineages suggests the derivative 12p allele could have been stabilized  
305 independently. We did not observe telomere repeat-containing reads mated to these loose



306 ends, arguing against telomere healing at these loci. Instead, loose reads represented highly  
307 repetitive unmappable sequences which may be a result of the junctions being in close  
308 proximity to centromeric regions (see below).

309

310 To resolve the genomic architecture at these loci we generated karyotypes from metaphase  
311 spreads for representative rearranged clones (Figure 6A, Supplementary Figure 6A), which  
312 revealed that in the BFB and chromothripsis (Y8) lineages, the chromosome 12 derivative was  
313 linked to a copy of chromosome 21 with an intact long arm (Supplementary Figure 6A). These  
314 results were confirmed with chromosome painting, demonstrating a derivative chromosome  
315 transitioning between 12 and 21 (Figure 6B-C, Supplementary Figure 6B). Two possible events  
316 can explain these findings: the 12-21 fusion could have occurred as an early event during  
317 telomere crisis, preceding the divergence of Y8 (chromothriptic) and the BFB lineage;  
318 alternatively, independent 21 fusion events stabilized the derivative chromosome 12 following  
319 formation of the distinct junction lineages in Figure 5C. We consider the first possibility unlikely  
320 since the creation of the long-range inversion ( $j1$ ) and subsequent fold back junctions in the BFB  
321 lineage would require the formation of interstitial 12p breaks on a 12p-21 derivative  
322 chromosome. Such breaks are predicted to result in the loss of 21, which would be distal to  
323 these junctions on the fusion allele. Furthermore, the acrocentric nature of chromosome 21  
324 would make it more likely to stabilize the overall chromosome architecture, suggesting that an  
325 early 12-21 derivative chromosome would be unlikely to engage in the additional SV events  
326 observed in the BFB lineage. We therefore consider it likely that each of the BFB cycles and  
327 chromothripsis clones were independently resolved through subsequent fusion to 21.

328

329 Unlike the BFB and chromothripsis clusters, the two 12p arm loss lineages (Y11 and Y15) did  
330 not fuse to chromosome 21. In the Y11 clone, the derivative chromosome 12 appears to contain  
331 a distinct fusion (with a longer p-arm), consistent with it being an independent lineage (Figure  
332 6C). We were unable to further resolve the nature of the stabilization events in these two clones.  
333 It would be necessary to perform long molecule DNA sequencing across different lineages in  
334 order to confirm the distinct nature of the fusion junction in each of the post-crisis clones.

335

### 336 **Telomere attrition renders 12p vulnerable**

337 The convergent evolution patterns observed in our system suggests either 12p vulnerability to  
338 rearrangements or selection for 12p loss during telomere crisis. We believe strong selection is  
339 unlikely, given the existence of day 150 clones with diploid 12p (15.8%, 13/82, with or without

340 21q gain). The preferential rearrangement of the short arm of chromosome 12 in the post-crisis  
341 system could be explained if one of the two 12p telomeres is among the shortest telomeres in  
342 the MRC5 parental cells. Attrition of the shortest telomeres is predicted to generate the first  
343 telomere fusions and associated rearrangements in the culture.

344  
345 We first asked whether the same parental allele was targeted across the chromosome 12-  
346 associated events in our cohort. Such allele specificity would argue against a selection for loss  
347 of 12p sequences as the driver for the 12p events since such selection should have occurred  
348 without preference for one allele. We phased heterozygous SNPs on 12p on the basis of  
349 whether they belonged to the lost (L) or retained (R) allele on the early 12p arm loss clone, Y11  
350 (Figure 7A). Analyzing phased SNP patterns across all the high- and low-pass MRC5 clone  
351 WGS profiles in our dataset demonstrated that the L allele of 12p was the exclusive target of all  
352 chromosome 12 structural variants (Figure 7B, Supplementary Figure 7A). This included the  
353 clones from the chromothripsis (Y8), and BFB (Z43) lineages (Figure 7C), which our  
354 phylogenetic analyses associated with independent alterations on a previously unrearranged  
355 chromosome 12. On the basis of these results, we concluded that the short arm of the L allele of  
356 12 was the most vulnerable to rearrangement in the MRC5 parental line.

357  
358 We next tested whether the preferential 12p events could be due to the presence of a short  
359 telomere on one of the 12p alleles. To this end, we combined telomeric FISH with BAC probes  
360 specific for chromosome 12 and two other chromosome (6 and 8) that did not show evidence for  
361 structural variants in WGS (Figure 7D, Figure 4B). Comparing the ratio of the telomeric signal of  
362 the shortest 12p telomeres to the signal of all other telomeres in individual metaphase spreads  
363 revealed that one of the 12p telomeres was significantly shorter (Figure 7E). The shortest  
364 telomeres of 6 and 18 (Supplementary Figure 7B) were also shorter than the median but not to  
365 the same extent as 12p. The relative telomere length of the shortest 21p allele showed a  
366 heterogenous distribution that overall was significantly longer than 12p in the parental cells  
367 (Figure 7E). This does not exclude the possibility of 21 becoming critically short at later time  
368 points, and indeed the observation of a low percentage of clones in the 5X WGS screening with  
369 amplifications of 21q could indicate that this chromosome end did occasionally become  
370 deprotected in this population (Figure 4C). Such deprotection of a chromosome 21 telomere is  
371 consistent with chromosome 21 preferentially stabilizing the derivative chromosome 12 (Figure  
372 6B, Supplementary Figure 6A).

373



374 To look for evidence of chromosome 12 being involved in the initial fusion events in this system  
375 we combined a chromosome 12 BAC probe with a centromere probe in  
376 MRC5/Rbsh/p21sh/iCRISPRa-TERT cells in crisis (at day 90). Strikingly, we observed a number  
377 of instances of chromosome 12 within chromosome fusion events (Figure 7F). The fraction of  
378 chromosome fusions involving chromosome 12 is higher than expected (~50% observed versus  
379 ~4% expected, Supplementary Figure 7C). Collectively, these data support the hypothesis that  
380 a short telomere on one allele of 12p increased the chance of 12p partaking in a fusion event  
381 that preceded subsequent rearrangement lineages.

382

383

## 384 Discussion

385

386 We have described the first whole genome profiles of cells emerging from natural telomere  
387 crisis, both in the setting of spontaneous and controlled telomerase activation. Analysis of a  
388 variety of post-crisis genomes from divergent lineages and independent immortalization events  
389 uncovered highly complex patterns of copy number amplification and rearrangement. These  
390 genomes were not typified by the expected predominance of fold-back inversions that are  
391 indicative of BFB cycles or low amplitude copy number oscillations associated with  
392 chromothripsis. These cell lines spent a varying amount of time in telomere crisis, potentially  
393 with very different numbers of chromosome fusions, which is hard to quantify with limited  
394 historical data available. Although we consider it unlikely, we cannot rule out the possibility that  
395 some of the rearrangements we observed are not a direct consequence of telomere crisis. Due  
396 to the limited similarities between these cell lines, we constructed an *in vitro* system that allowed  
397 us to sequence high numbers of post-crisis genomes.

398

399 We consider our *in vitro* system to be a good representation of telomere crisis for a number of  
400 reasons. Telomeres in this system have been eroded through replicative attrition, rather than  
401 being subject to acute deprotection by the removal of TRF2. This is an important distinction  
402 since telomeres lacking TRF2 are repaired by c-NHEJ whereas other pathways are active at  
403 naturally eroded telomeres<sup>35,38,39</sup>. Furthermore, the number of dicentric chromosomes in our  
404 system is low (generally 1-2 per metaphase spread) which is similar to the frequency observed  
405 in other natural telomere crisis systems<sup>29</sup>. Apart from the abrogation of the Rb/p21 pathways,  
406 which is considered likely to occur before telomere crisis *in vivo*<sup>40-43</sup>, these cells contain intact  
407 DNA repair pathways, and we make no assumptions as to what the predominant repair

408 mechanisms will be in this context. Further, the relatively weak telomerase activity that can only  
409 sustain the shortest telomeres within the population is similar to what occurs in cancer, since  
410 many tumours maintain very short telomeres despite activation of telomerase<sup>44–47</sup>.

411  
412 This system revealed striking convergent evolution of rearrangements on chromosome 12p, for  
413 which we consider the most plausible explanation to be a short telomere on one of the 12p  
414 alleles driving the first chromosome fusions in telomere crisis. Although the rearrangement  
415 events on 12p are likely specific to this cell line, we can draw valid conclusions about the  
416 consequence of short telomeres across other systems. It seems likely that the first events  
417 during telomere crisis are driven by the shortest telomere(s) within a cell population. We define  
418 a minimal set of events that can occur as a result of a single deprotected telomere. We  
419 document clean patterns of BFB-like events that represent progressive stages in the evolution  
420 of more complex genome architectures. This data has provided an important snapshot into the  
421 events that occur during a relatively short time period of telomere crisis. The comparatively flat  
422 genomes in the majority of post-crisis clones suggest that the consequences of telomere crisis  
423 do not have to be spectacular. It may be that in this system there is selection against complex  
424 events involving multiple chromosomes. The more complex events that can be observed in the  
425 immediate aftermath of dicentric chromosome resolution<sup>14</sup> may not lead to viable post-crisis  
426 clones. Our data also point to a surprising role for acrocentric chromosomes in stabilizing fusion  
427 events, which has also been suggested and observed in other studies<sup>14,48</sup>. Since it was  
428 technically challenging to resolve these stabilizing events using solely WGS analysis, it is  
429 possible that these types of events have been overlooked in large-scale WGS analyses and  
430 could be an important hallmark of post-crisis genomes.

431  
432 In summary, our data reveal that telomere crisis can instigate a wide spectrum of structural  
433 variations in the viable descendants of this genomic trauma. Since no single type of variation  
434 appears to be a hallmark of past telomere crisis, other genomic insignia of telomere crisis will  
435 have to be identified in order to determine whether a given cancer has experienced telomere  
436 dysfunction in its proliferative history.

437

## 438 **Methods**

439

## 440 **Cell lines**

441 MRC5 human lung fibroblasts (CCL-171), Phoenix-ampho (CRL-3213), RPE-1 hTERT (CRL-  
442 4000), HCT-116 (CCL-247) and U2-OS (HTB-96) cells were obtained from ATCC for this study.  
443 293-FT cells were obtained from ThermoFisher. MRC5 cells and derivatives thereof were grown  
444 in EMEM media (ATCC) supplemented with 15% fetal bovine serum (FBS; Gibco) and 100  
445 U/mL of penicillin and 100 µg/mL streptomycin (PenStrep, Gibco) at 37°C, 5% CO<sub>2</sub>. hTERT  
446 RPE-1 cells were grown in DMEM:F12 media (Gibco) with 10% FBS and PenStrep at 37°C, 5%  
447 CO<sub>2</sub>. HCT-116 colorectal carcinoma cells and U2OS cells were grown in DMEM with 10% FBS  
448 and PenStrep at 37°C, 5% CO<sub>2</sub>.

449

#### 450 **Immortalized cell line panel**

451 Details of the post-crisis immortalized cell line panel are provided in Supplementary Table 1. HA-  
452 1M cells were a kind gift of Silvia Bacchetti<sup>29</sup>, SW13/26/39 cells were a kind gift of Jerry Shay<sup>28</sup>,  
453 and Bet-3B/3K and BFT-3B/G/K cells were a kind gift of Roger Reddel<sup>27</sup>.

454

455

#### 456 **Cloning and plasmids**

457 A dual-shRNA vector LM2PshRB.698-p21.890-PURO was used to knockdown Rb and p21<sup>49</sup>.  
458 The inducible dCas9-VPR (pCW57-dCas9-VPR) construct was created by Gibson assembly of  
459 the dCas9-VPR insert from SP-dCas9-VPR (Addgene#63798) into pCW57-MCS1-P2A-MCS2-  
460 Neo (Addgene#89180). Retroviral pLVX-hTERT was a kind gift of Teresa Davoli. Activating  
461 *TERT* gRNAs were targeted up to 1000 bp upstream of the *TERT* promoter transcriptional start  
462 site, and designed using online software from the Broad Institute  
463 ([portals.broadinstitute.org/gpp/public/analysis-tools/sgRNA-design](https://portals.broadinstitute.org/gpp/public/analysis-tools/sgRNA-design)). gRNA sequences were  
464 cloned into a modified version of lentiGuide-Puro (Addgene#52963) in which the selection  
465 cassette had been swapped for Zeocin resistance. Activating *TERT* gRNA sequences are  
466 shown in Supplementary Table 3. *TTN* gRNA sequences were used as described<sup>32</sup>.

467

#### 468 **Viral gene delivery**

469 Retroviral constructs were transfected into Phoenix amphitropic cells using calcium phosphate  
470 precipitation. Lentiviral constructs were transfected with appropriate packaging vectors using  
471 calcium phosphate precipitation into 293-FT cells. Viral supernatants were collected and filtered  
472 before addition to target cells, supplemented with 4 µg/ml polybrene. For activating gRNA  
473 constructs, multiple viral supernatants were collected and concentrated using PEG-it Virus

474 Precipitation Solution (System Biosciences LV810A-1). Cells were infected 2-3 times at 12-hour  
475 intervals before selection in the appropriate antibiotic.

476

#### 477 **Immunoblotting**

478 For immunoblotting, cell pellets were directly lysed in 1X Laemmli buffer (2% SDS, 5%  $\beta$ -  
479 mercaptoethanol, 10% glycerol, 0.002% bromophenol blue and 62.5 mM Tris-HCl pH 6.8) at a  
480 concentration of  $10^7$  cells/ml. Lysates were denatured at 100°C, and DNA was sheared with a  
481 28½ gauge insulin needle. Lysates were resolved on SDS/PAGE gels (Life Technologies),  
482 transferred to nitrocellulose membranes and blocked with 5% milk in TBS with 0.1% Tween-20.  
483 Primary antibodies (anti-Cas9 7A9-3A3, Cell Signaling Technology #14697S, anti- $\gamma$ -tubulin  
484 Sigma#T5326, anti-Human Retinoblastoma protein BD Pharmingen #554136, anti-p21 F-5  
485 Santa Cruz sc-6246) were incubated overnight, before membrane washing and incubation with  
486 appropriate HRP-conjugated secondary antibodies (Amersham) and detection with SuperSignal  
487 ECL West Pico PLUS chemiluminescence (ThermoFisher).

488

#### 489 **Immunofluorescence**

490 Cells were grown on glass coverslips and fixed in 3% paraformaldehyde and 2% sucrose.  
491 Coverslips were permeabilized in 0.5% Triton-X-100/PBS, and blocked in goat block (0.1%  
492 BSA, 3% goat serum, 0.1% Triton-X-100, 2mM EDTA) in PBS. Primary and secondary  
493 antibodies (Rabbit anti-53BP1 Abcam #ab-175933, F(ab')<sub>2</sub>-Goat anti-Rabbit IgG (H+L) Cross-  
494 Adsorbed Alexa Fluor 488 ThermoFisher A-11070) were diluted in goat block. Slides were  
495 counter-stained with DAPI and mounted using Prolong gold anti-fade medium. Images were  
496 acquired on a DeltaVision microscope (Applied Precision) equipped with a cooled charge-  
497 coupled device camera (DV Elite CMOS Camera), with a PlanApo 60× 1.42 NA objective  
498 (Olympus America), and SoftWoRx software. Images were analyzed for foci numbers using a  
499 custom-made algorithm written for FIJI, courtesy of Leonid Timashev<sup>50</sup>.

500

#### 501 **Metaphase spread preparation and staining**

502 Metaphase spreads were prepared by treatment of cells with 0.1  $\mu$ g/ml colcemid (Roche) for 3  
503 hours, before trypsinization and swelling at 37°C for 5-10 mins in 0.075 M KCl. Cells were fixed  
504 in a freshly prepared 3:1 mixture of methanol to acetic acid and stored at 4°C at least overnight.  
505 Spreads were prepared by dropping cell solution onto cold glass slides exposed to steam from a  
506 75°C water bath, flooding slide with acetic acid, before exposure of the dropped cells for 3-5  
507 secs in steam. Slides were dried overnight before storage in 100% Ethanol at -20°C. For

508 visualization of fusions, slides were rinsed in PBS, fixed in 4% formaldehyde/PBS for 5 mins,  
509 and dehydrated in an ethanol series before co-denaturation of slide and PNA probes (TelG-Cy3  
510 PNA Bio F1006, CENPB-AF488 PNA Bio F3004) for 3 mins at 80°C in hybridization solution (10  
511 mM Tris-HCl pH 7.2, 70% formamide, 0.5% Roche 11096176001 blocking reagent).

512 Hybridization was carried out for 2 hours at RT in the dark, before washing twice in 10 mM Tris-  
513 HCl pH 7.2, 70% formamide and 0.1% BSA, then washing three times in 0.1 M Tris-HCl pH 7.2,  
514 0.15M NaCl, 0.08% Tween-20. DAPI was included in the second wash. Slides were dehydrated  
515 through an ethanol series before mounting with Prolong Gold antifade medium (Invitrogen).

516 For chromosome painting, slides were prepared as above for chromosome fusions, and  
517 co-denaturation of chromosome specific paints (XCP-12 Metasystems D-0312-050-FI, XCP-21  
518 Metasystems D-0321-050-OR) was carried out at 75°C for 2 mins, before hybridization  
519 overnight at 37°C. Post hybridization washes were 0.4X SSC for 2 mins at 72°C, 2X SSC,  
520 0.05% Tween-20 for 30 secs, followed by counterstaining in DAPI for 15 min, and a rinse in  
521 ddH<sub>2</sub>O before mounting in Prolong Gold antifade medium (Invitrogen). For karyotyping, slides  
522 were prepared as above, and analysis was carried out on DAPI stained chromosomes.

523

#### 524 **BAC probes**

525 To identify individual chromosomes on metaphase spreads, BAC probes were ordered from  
526 BACPAC Genomics (Chr.12p11.2 RP11-90H7, Chr.18q12.3~21.1 RP11-91K12,  
527 Chr.6p21.2~21.3 RP11-79J17). Probe DNA was nick-translated with either Digoxigenin-11-UTP  
528 or Biotin-16-UTP (Roche) using DNase I (Roche) and DNA polymerase I (NEB) overnight at  
529 15°C. Probes were precipitated with Cot1 Human DNA (Invitrogen) and salmon sperm DNA  
530 (Invitrogen) and resuspended in 50% formamide, 2X SSC and 10% dextran sulfate before  
531 denaturation for 8 mins at 80°C. Metaphase spreads were prepared as above, and slides were  
532 denatured with 70% formamide, 2X SSC for 2 mins at 80°C before dehydration through an  
533 ethanol series. Slides were co-denatured for 2 mins at 80°C with TelG-647 (PNA Bio F1014) in  
534 hybridization solution (10mM Tris-HCl pH 7.2, 70% formamide, 0.5% Roche 11096176001  
535 blocking reagent) followed by a 2-hour hybridization at RT. Denatured BAC probes were then  
536 applied and hybridized overnight at 37°C. Slides were washed for 3 x 5 mins in 1X SSC at 60°C,  
537 followed by a blocking step in 30 µg/ml BSA, 4X SSC and 0.1% Tween-20 for 30 mins at 37°C.  
538 BAC probes were detected with anti-Digoxenin-Rhodamine (Roche 11207750910) and Avadin-  
539 FITC antibodies (VWR CAP21221) in 10 µg/ml BSA, 1X SSC and 0.1% Tween-20 by incubating  
540 for 30 mins at 37°C, before washing twice for 5 mins in 4X SSC and 0.1% Tween-20 at 42°C.

541 Counterstaining with DAPI was carried out for 15 mins at RT, before a further wash at 42°C in  
542 4X SSC, 0.1% Tween-20 and mounting in Prolong-Gold antifade (Invitrogen). Images were  
543 acquired on the Deltavision microscope equipment detailed above. Images were analyzed using  
544 FIJI<sup>51</sup>. Briefly, individual chromosomes were detected with the BAC probes. Intensity  
545 measurements of the Tel-G signal were quantified for each p-arm and q-arm of identified  
546 chromosomes. Measurements were also taken for all other telomeres in the same spread.  
547 Background subtracted measurements for all telomeres were compared to the shortest (lowest  
548 intensity) of the Chr.12p (or Chr.18p or Chr.6p) telomeres on each spread, and the results  
549 expressed as a ratio. For identification of fusions containing chromosome 12, the same protocol  
550 was carried out using a centromere probe (CENPB-AF488, PNA Bio F3004).

551

### 552 **qPCR**

553 RNA was isolated from cell pellets using a Qiagen RNeasy kit, according to the manufacturer's  
554 instructions. cDNA was synthesized using Superscript IV first-strand synthesis (ThermoFisher).  
555 qPCR was carried with SYBER Green reagents (ThermoFisher) and run on a Life Technologies  
556 QuantStudio 12K machine. qPCR primer sequences are shown in Supplementary Table 3.  
557 Expression was quantified using the standard  $\Delta\Delta$ CT method relative to  $\beta$ -actin.

558

### 559 **TRAP assay**

560 Telomerase activity was assessed using the TRAPeze kit (EMD Millipore S7700) according to  
561 the manufacturer's instructions. Amplification products were resolved on 12% PAGE gels and  
562 visualized with EtBr staining.

563

### 564 **STELA, Fusion PCR and telomeric blots**

565 High molecular weight DNA was extracted from cell pellets using a MagAttract HMW DNA kit  
566 (Qiagen) and solubilized by overnight digestion with *EcoRI* (for STELA and Fusion PCR) or a  
567 combination of *AluI* and *MboI* (for telomeric blots). STELA was carried out essentially as  
568 described<sup>34</sup>. Briefly, 10 ng of DNA was annealed to a mixture of six telomere linkers  
569 (Supplementary Table 3) overnight at 35°C, before dilution with water to a concentration of 200  
570 pg/ $\mu$ l. Multiple PCR reactions for each sample were carried out with 200 pg of annealed DNA  
571 using the XpYpE2 and teltail primers (Supplementary Table 3) and FailSafe PCR reagents  
572 (Epicentre). PCR conditions were as follows: 94°C for 15s, 27 cycles of 95°C for 15s, 58°C for  
573 20s, 68°C for 10 mins, and a final extension at 68°C for 9 mins. PCR products were resolved on  
574 0.8% TAE gels, denatured and transferred to Hybond membrane via Southern blotting. Products



575 were detected with a randomly primed  $\alpha$ -<sup>32</sup>P DNA probe created by amplification of the  
576 telomere-adjacent region of the XpYp telomere (using XpYpE2 and XpYpB2 primers,  
577 Supplementary Table 3). For quantification, FIJI was used to measure relative signal between  
578 indicated molecular weight markers relative to background signal for each sample.

579 Fusion PCR was carried out essentially as described<sup>11,35</sup>. Subtelomeric primers  
580 (Supplementary Table 3) used for amplification of telomeric fusions were XpYpM, 17p6 and  
581 21q4. The control primer XpYpc2tr was included for control amplification of XpYp subtelomeric  
582 DNA and detected using EtBr. Fusion products were detected with a random primed  $\alpha$ -<sup>32</sup>P  
583 labelled DNA probe (21q probe) specific for the TelBam11 telomere subfamily<sup>36,52</sup>, which was  
584 created with the 21q4 primer and 21q-seq-rev2. The number of fusions per haploid genome (6  
585 pg) is calculated based on the amount of input DNA in each PCR reaction.

586 Telomere length was assessed using telomeric restriction fragment analysis. Briefly,  
587 *AluI/MboI*-digested genomic DNA was run on 0.8% TAE gels, before denaturation,  
588 neutralization, and transfer onto a Hybond membrane according to standard Southern blotting  
589 procedures. Telomeric DNA was detected using a  $\alpha$ -<sup>32</sup>P labelled Sty11 telomeric repeat probe<sup>45</sup>.

590

### 591 **WGS Library preparation**

592 Genomic DNA was extracted from cell pellets using a QIAGEN QIAamp DNA mini kit and  
593 sheared using a Covaris Ultrasonicator (E220) to approximately 300 bp fragments. DNA  
594 concentration was measured using Qbit 4.0 reagents (ThermoFisher) and 200 ng of fragmented  
595 DNA was used for library preparation. End repair and A-tailing was carried out with NEBNext  
596 End repair reaction enzyme mix and buffer (E7442), and KAPA Dual-Indexed Adapters (Roche)  
597 were ligated using the T4 DNA ligase kit from NEB (M0202). Post-ligation size selection was  
598 performed with AMPure XP beads (Beckman Coulter) before washing two times in 80% ethanol.  
599 Libraries were amplified using KAPA HiFi HotStart ready mix (Roche) and P5 and P7 primers  
600 (IDT). PCR program was as follows: 98°C for 45 s, 5 cycles of 98°C for 15 s, 60°C for 30 s,  
601 72°C for 30 s and a final extension at 72°C for 5 mins. A further size selection and washing step  
602 was carried out after library amplification, and library quality was confirmed on Bioanalyzer chips  
603 (Agilent) and using a KAPA Library Quantification kit (Roche). Libraries were pooled and  
604 submitted for sequencing on NovaSeq 6000 at the New York Genome Center.

605

### 606 **WGS basic data processing**

607 Reads were aligned to GRCh37/hg19 using the Burroughs-Wheeler aligner (bwa mem v0.7.8,  
608 <http://bio-bwa.sourceforge.net/>)<sup>53</sup>. Best practices for post-alignment data processing were

609 followed through use of Picard (<https://broadinstitute.github.io/picard/>) tools to mark duplicates,  
610 the GATK (v.2.7.4) (<https://software.broadinstitute.org/gatk/>) IndelRealigner module, and GATK  
611 base quality recalibration.

612 Variant rearrangement junctions were identified using SvAbA<sup>54</sup> (<https://github.com/walaj/svaba>)  
613 and GRIDSS<sup>31</sup> (<https://github.com/PapenfussLab/gridss>) with standard settings. For MRC5  
614 samples, the somatic variant setting of each tool was used, with the ancestral MRC5 line as the  
615 matched normal. SvAbA was applied using a panel of normals (PON) that was constructed by  
616 running SvABA to obtain constitutional junction calls for 1,017 TCGA tumor/normal pairs (TCGA  
617 dbGaP: phs000178.v11.p8). For GRIDSS, a PON was obtained from the Hartwig Medical  
618 Foundation (<https://nextcloud.hartwigmedicalfoundation.nl>). 1 kbp binned GC and mappability  
619 corrected read depth was computed using fragCounter (<https://github.com/mskilab/fragcounter>).  
620 Systematic read depth bias was subsequently removed using dryclean  
621 (<https://github.com/mskilab/dryclean>)<sup>55</sup>.

622

### 623 **Low-pass WGS clustering**

624 Genome-wide binned read depth was aggregated across 118 low pass WGS clones across 10  
625 kbp bins by taking the median of 1 kbp binned normalized read depth from dryclean (see  
626 above). To minimize read depth noise in unmappable regions, recurrent (>10% of the cohort)  
627 low-quality coverage regions (defined in ref.<sup>3</sup>) are combined with regions bearing consistently  
628 high variance in our high-pass sequencing dataset (standard deviation >0.3 for bin value over  
629 the mean in 100 kbp windows). Hierarchical clustering was then applied on the genome-wide  
630 Euclidean distance of bins, with “method = ward.D2” option. Six clusters were identified  
631 following dendrogram inspection.

632

### 633 **Junction balance analysis**

634 Preliminary junction balanced genome graphs were generated for MRC5 and SV40T cell lines  
635 from binned read depth and junction calls (see above) using JaBbA  
636 (<https://github.com/mskilab/JaBbA>)<sup>3</sup>. Briefly, 1 Kbp binned read depth output from dryclean was  
637 collapsed to 5 Kbp and JaBbA was run with slack penalty 500. gGnome  
638 (<https://github.com/mskilab/gGnome>) was used to identify complex structural variant patterns.  
639 Genome graphs and corresponding genomic data (e.g. binned coverage, allelic bin counts)  
640 were visualized using gTrack (<https://github.com/mskilab/gTrack>).

641

### 642 **Joint inference of junction balance in MRC5**



643 To chart structural variant evolution across sub-clades of MRC5 clones, a procedure was  
 644 developed to jointly infer junction balanced genome graphs in a lineage (e.g. BFB lineage in  
 645 Figure 5C). This co-calling algorithm augmented the existing JaBbA model, described in detail  
 646 in<sup>3</sup>, enabling application to a compendium of genome graphs by minimizing the total number of  
 647 unique loose ends assigned a nonzero copy number across the graph compendium.  
 648 To describe this algorithm, we extend the notation introduced in ref.<sup>3</sup>. Formally, we define a  
 649 collection  $\{G^i\}_{i \in 1, \dots, n}$  of identical genome graphs across  $n$  clones, each a replica of a “prototype”  
 650 genome graph  $G^0$ . The mapping  $p$  maps each vertex  $v \in V(G^i)$  and edge  $e \in E(G^i), i \in 1, \dots, n$   
 651 to its corresponding vertex  $p(v) \in V(G^0)$  and edge  $p(e) \in E(G^0)$  in the prototype graph. We  
 652 then jointly infer unique copy number assignments  $\kappa^i$  to the vertices and edges of each genome  
 653 graph  $G^i$  by solving the mixed integer program:

$$654 \quad \text{minimize}_{\kappa^i: V_1(G^i) \cup E(G^i) \rightarrow \mathbb{N}, i \in 1, \dots, n} \lambda \mathcal{R}(\{G^i\}_{i \in 0, \dots, n}, \{\kappa^i\}_{i \in 1, \dots, n}, p) + \sum_{i \in 1, \dots, n} \mathcal{V}(G^i, \kappa^i, x^i, J^i) \quad (1)$$

655 *subject to:*

$$656 \quad \kappa^i(v) = \kappa^i(\bar{v}), \quad \forall v \in V_1(G^i), i \in 1, \dots, n$$

$$657 \quad \kappa^i(e) = \kappa^i(\bar{e}), \quad \forall e \in E(G^i), i \in 1, \dots, n$$

$$658 \quad \kappa^i(v) = \sum_{e \in E^-(v, G^i)} \kappa^i(e) = \sum_{e \in E^+(v, G^i)} \kappa^i(e)$$

$$659 \quad \kappa^i(e) = \kappa^i(\bar{e}), \quad \forall e \in E(G^i), i \in 1, \dots, n$$

$$660 \quad \kappa^i(e) \leq u^i(e), \quad e \in E(G^i), i \in 1, \dots, n$$

661 where  $x^i$  and  $J^i$  represent the binned read depth data and bin-node mappings for clone  $i$   
 662 and  $\mathcal{V}(G^i, \kappa^i, x^i, J^i)$  is the read depth residual for genome graph  $i$ , analogous to<sup>3</sup>. An addition  
 663 term in this new joint formulation is  $\mu^i: E(G^i) \rightarrow \{0, \infty\}$ , which is a data derived mapping that  
 664 constrains the upper bound of each edge  $e \in E(G^i)$ , e.g. on the basis of whether that junction  
 665 has read support in clone  $i$ . In addition, a joint complexity penalty  $\mathcal{R}$  couples the collection  $\{\kappa^i\}$  of  
 666 copy number mappings across the collection of graphs  $\{G^i\}_{i \in 1, \dots, n}$  to each other by jointly  
 667 penalizing loose ends at all vertices that map to the same prototype graph vertex  $v \in V(G^0)$ .  
 668 Formally,

$$669 \quad \mathcal{R}(\{G^i\}_{i \in 0, \dots, n}, \{\kappa^i\}_{i \in 1, \dots, n}, p) = \sum_{v \in V(G^0)} \left\| \sum_{\hat{v} | \hat{v} \in G^i, p(\hat{v})=v, i \in 1, \dots, n} \kappa^i(\hat{v}) \right\| \quad (2)$$

670 As in <sup>3</sup>, the hyperparameter  $\lambda$  in Equation 1 controls the relative contribution of the read-  
671 depth residual and complexity penalty to the objective function. It is important to note that while  
672 each of the graphs  $G^i$  have an identical structure, the constraints imposed by the upper bounds  
673  $u^i$  and bin profiles  $x^i$  couple each graph to its junction and read depth data, and hence lead to a  
674 unique fit  $\kappa^i$  on the basis of this data. The  $\ell_0$  penalty (defined using the Iverson bracket  $\mathbb{I}$  ]  
675 operator) in Equation 2 couples the solutions  $\kappa^i$  by adding an exponential prior on the number of  
676 unique loose ends across entire graph compendium, where uniqueness is defined by the  
677 mapping  $p$  to the prototype graph  $G^0$ .

678 This joint mixed-integer programming model in Equation 1 is implemented in the  
679 “balance” function of gGnome. The model was applied to a collection of genome graphs  
680 representing the structure of chromosome 12 across 13 clones. The prototype graph for this  
681 genome graph collection was built from the disjoint union of intervals of the 13 preliminary  
682 graphs (via the GenomicRanges “disjoin” function) and the union of junction calls fit across  
683 those graphs (via gGnome “merge.Junction” function). Each graph was associated using the  
684 read depth data and bin-to-node mappings as per <sup>3</sup>. The mapping  $u^i$  for each reference edge  
685 was set to  $\infty$  while variant edges were assigned  $\infty$  on the basis of bwa mem realignments of  
686 read pairs in each clone .bam file to the corresponding junction contig via rSeqLib  
687 (<https://github.com/mskilab/rSeqLib>)<sup>56</sup>, otherwise they were assigned 0.

688 Equation 1 was then solved using the IBM CPLEX (v12.6.2) MIQP optimizer within the  
689 gGnome package after setting the hyperparameter  $\lambda$  to 100. This value was chosen after a  
690 parameter sweep observing for the visual concordance of genome graphs, loose ends, and read  
691 depth profiles in the region.

692

### 693 **Joint reconstruction of allelic evolution in MRC5**

694 Evolving 12p alleles were jointly reconstructed across 13 MRC5 clones through the  
695 analysis of junction balanced genome graphs  $(G^i, \kappa^i)$  (see “Joint inference of junction balance in  
696 MRC5” section above). The procedure for joint allelic phasing described in <sup>3</sup> was extended to  
697 identify the most parsimonious collection of linear and/or cyclic walks and associated walk copy  
698 numbers that summed to the vertex and edge copy numbers in the compendium  $(G^i, \kappa^i)$ .

699 Formally, the subgraph of vertices and edges with a nonzero copy number in each  
700  $(G^i, \kappa^i)$  were exhaustively traversed to derive all minimal paths and cycles  $H^i$ , where for each  
701 walk  $h \in H^i$  maps to subsets  $V(h) \subseteq V(G^i)$  and  $E(h) \subseteq E(G^i)$  of vertices and edges in the graph  
702  $G^i$ . The nodes and vertices of these walks were then projected to via the mapping  $p$  to define a

703 unique set of walks  $H^0$  in the prototype graph  $G^0$ . We extend our notation  $p$  (see previous  
704 section) so that for a walk  $h \in H^i$  the mapping  $p(h) \in H^0$  denotes the walk formed by projecting  
705 the vertices and edges of  $h$  via  $p$  to  $H^0$ . With these definitions, the single graph haplotype  
706 inference defined in <sup>3</sup> was extended to a joint inference by solving the following mixed integer  
707 linear program to assign a copy number  $\phi^i(h) \in \mathbb{N}$  to each walk  $h \in H^i$ .

$$708 \quad \text{minimize}_{\phi^i: H^i \rightarrow \mathbb{N}, i \in 1, \dots, n} \sum_{h \in H^0} \left\| \sum_{\hat{h} \in H^i \mid p(\hat{h})=h, i \in 1, \dots, n} \phi^i(\hat{h}) \right\| \quad (3)$$

709 subject to:

$$710 \quad \kappa^i(v) = \sum_{h \in H^i} \phi^i(h) \delta(v, h), \quad \forall v \in V_I(G^i), i \in 1, \dots, n$$

$$711 \quad \kappa^i(e) = \sum_{h \in H^i} \phi^i(h) \delta(e, h), \quad \forall e \in E(G^i), i \in 1, \dots, n$$

712 where the function  $\delta(v, h)$  and  $\delta(e, h)$  is 1 if vertex  $v$  and edge  $e$  belong to walk  $h$  and 0  
713 otherwise. The Iverson bracket ( $\| \cdot \|$ ) operator in the objective function Equation 3 minimizes the  
714 total number of unique walks used across the compendium, hence identifying a jointly  
715 parsimonious assignment of copy number to walks across the compendium of graphs.  
716 Equation 3 was solved using the IBM CPLEX (v12.6.2) MIQP optimizer within the gGnome  
717 package. Variant cycles and paths from the resulting solution were manually combined to yield  
718 a set of consistent linear paths, i.e. somatic haplotypes, to yield allelic reconstructions in Figure  
719 5C.

720

### 721 **Loose end classification**

722 Each loose end in each MRC5 genome graph was analyzed to identify a clone specific (i.e.  
723 absent in the ancestral MRC5 line) origin for the mates of high mapping quality (MAPQ=60)  
724 reads mapping to the location and strand of the loose end. These mates were assessed for neo-  
725 telomeric sequences by counting instances of 11 permutations of a 12-bp telomere repeat motif  
726 (TTAGGGTTAGGG) (using the R / Bioconductor Biostrings package) in the mates. The mates  
727 were also assembled into contigs using fermi<sup>57</sup> aligned using bwa mem<sup>58</sup> via the RSeqLib R  
728 package<sup>56</sup> to hg38 (which contains a more highly resolved centromere build) to characterize  
729 novel repeat (e.g. centromere) fusions (GATK Human reference genome, hg38, data bundle  
730 including Homo\_sapiens\_assembly38.fasta, gs://gcp-public-data--broad-reference). The loose  
731 end loci were also assessed through overlap with the hg19 repeatMasker database

732 (human\_g1k\_v37\_decoy.repeatmasker) for the presence of reference annotated repeats that  
733 might explain the absence of a mappable junction explaining the copy number change.

734

### 735 **SNV phylogeny**

736 To compute an SNV phylogeny across MRC clones, we first identified SNV that were acquired  
737 in MRC5 clones relative to the ancestral MRC5 line using Strelka<sup>59</sup>  
738 (<https://github.com/Illumina/strelka>) under paired (i.e. tumor / normal) mode with the clone as  
739 the “tumor” and the MRC ancestral line as the “normal” sample and default parameters and  
740 GATK hg19 resource bundle (Genome Analysis Toolkit GATK Resource Bundle for hg19;  
741 [gs://gatk-legacy-bundles](https://gatk-legacy-bundles)). Acquired SNVs were first filtered according to the Strelka2 PASS  
742 filter as well as additional filters (MQ = 60, SomaticEVS>12, total ALT count > 4) yielding 27,220  
743 total unique variants across the 13 MRC5 clones. Reference and variant allelic read counts  
744 were assessed at each SNV site (via the R / Bioconductor Rsamtools package, version 3.6.1,  
745 <http://www.r-project.org/>) across all 13 clones. We then further required a >0.5 posterior  
746 probability of a variant being present in a sample, by assuming Binomial likelihood of variant  
747 read count and using the aggregated allele frequency in all samples as the prior, resulting in the  
748 final 14,970 unique mutations. The binary matrix of clones by SNV loci. was then used to derive  
749 a neighbor-joining phylogenetic tree using the R / Bioconductor package ape. Following tree  
750 construction, we associated each SNV with its most likely phylogenetic tree branch by  
751 comparing the binary incidence vector associated with each SNV with the binary incidence  
752 vector associated with each tree branch, and finding the closest branch using Jaccard distance,  
753 only linking SNV to branches when the SNV was within <0.1 Jaccard distance of the closest  
754 branch, thus producing the groupings of SNVs in Figure 5A.

755

### 756 **Parental SNP allelic phasing and imbalance**

757 Germline heterozygous sites in the parental MRC5 line were identified by computing allelic  
758 counts at HapMap sites (GATK human reference genome, hg19 data bundle,  
759 [hapmap\\_3.3.b37.vcf](https://www.ncbi.nlm.nih.gov/ftp/gen/hapmap/)) and identifying loci with variant allele fraction >0.3 and <0.7. Y11, a clone  
760 with loss of a single allele at 12p, was chosen to phase parental SNPs on 12p. At each locus,  
761 the allele (reference or alternate) with a 0 read count was assigned to the “L” (lost) haplotype  
762 and the other allele was assigned to the “R” (retained) haplotype. (All heterozygous SNP loci in  
763 the region contained exactly one allele with a 0 read count). L and R allelic counts were then  
764 computed at these sites across all 13 high pass WGS and 131 low pass WGS samples. These

765 counts were divided by the genome wide mean of heterozygous SNP allele counts (in these  
766 100% pure and nearly diploid samples) to derive the absolute allelic copy number<sup>60</sup>.

767

### 768 **SNV clustering**

769 Inter-SNV distances were computed for all pairs of reference adjacent acquired SNVs  
770 associated with each MRC5 clone and visualized as rainfall plots. Runs of two or more SNVs  
771 with inter SNV distances < 2 Kbp were nominated as clusters. Two distinct SNV clusters were  
772 identified on chromosome 12p across the 13 clones.

773

### 774 **Statistical Analysis**

775 Statistical analysis for in vitro experiments was carried out using Prism software (GraphPad  
776 Software). All relevant statistical experimental details (n numbers, SD) are provided in the figure  
777 legends. Statistically significant associations between binary variables were determined using  
778 two-tailed Fisher's exact test. Significance was assessed on the basis of Bonferroni-corrected *P*  
779 values < 0.05. Effect sizes (odds ratios) are reported alongside 95% confidence intervals for  
780 each test. Details of all other quantitative analyses (e.g. read depth processing, clone clustering,  
781 genome graph inference, allelic reconstructions, phylogenetic reconstruction, SNV clustering,  
782 parental SNP phasing) are described above.

783

### 784 **Data and Code Availability**

785 Custom software packages referenced in this study are available at <https://github.com/mskilab>  
786 (JaBbA build d7f4bff, gGnome build c998026, dryclean build 6d2bced, fragCounter build 575af99,  
787 rSeqLib build 23fbaf0, skitools build 61187fa, gUtils build 449ab2a, gTrack build 947c35c).  
788 Analysis code to generate the figures in the paper is available on request. Whole genome  
789 sequencing data has been deposited to the sequence read archive as aligned .bam files  
790 (<https://www.ncbi.nlm.nih.gov/sra>) under the identifier SUB8078633 (submission pending).

791

792

### 793 **Acknowledgements**

794 We thank Jerry Shay (UTSW), Silvia Bacchetti, AdVec and Roger Reddel (CMRI) for the  
795 generous provision of cell lines used in this study. S.M.D is funded jointly by a NIH/NCI grant  
796 (5R35CA210036) and Melanoma Research Alliance grant (577521) both awarded to T.d.L.  
797 T.d.L has additional funding support from NIH/NIA (5R01AG016642-21A1), Starr Cancer  
798 Consortium (I13-0019), Breast Cancer Research Foundation and a Glenn Foundation Award

799 from the Glenn Foundation. M.I., X.Y., J.B., and H.T. are supported by Burroughs Wellcome  
800 Fund Career Award for Medical Scientists, Doris Duke Clinical Foundation Clinical Scientist  
801 Development Award, Starr Cancer Consortium Award, and National Institutes of Health (NIH)  
802 U24-CA15020 to M.I., as well as Weill Cornell Medicine Department of Pathology Laboratory  
803 Medicine startup funds.

804

#### 805 **Author contributions**

806 Conceptualization: S.M.D, M.I, T.d.L

807 Methodology: S.M.D, Y.X, M.I

808 Software and Formal Analysis: Y.X, J.R, J.B, M.I

809 Investigation: S.M.D, N.B, K.T, H.T

810 Writing – Original Draft: S.M.D, M.I, T.d.L

811 Writing – Review and Editing: S.M.D, Y.X, M.I, T.d.L

812 Supervision and Funding Acquisition: T.d.L, M.I

813

#### 814 **Competing interests**

815 Titia de Lange is on the SAB of Calico Life Sciences, LLC. The other authors have no competing  
816 interests.

817

#### 818 **References**

819

- 820 1. Drier, Y. et al. Somatic rearrangements across cancer reveal classes of samples with  
821 distinct patterns of DNA breakage and rearrangement-induced hypermutability. *Genome*  
822 *Res* **23**, 228-235 (2013).
- 823 2. Yang, L. et al. Diverse mechanisms of somatic structural variations in human cancer  
824 genomes. *Cell* **153**, 919-929 (2013).
- 825 3. Hadi, K. et al. Novel patterns of complex structural variation revealed across thousands of  
826 cancer genome graphs. *bioRxiv* 836296 (2019).
- 827 4. ICGC/TCGA, P.-C. A. O. W. G. C. Pan-cancer analysis of whole genomes. *Nature* **578**,  
828 82-93 (2020).
- 829 5. Li, Y. et al. Patterns of somatic structural variation in human cancer genomes. *Nature* **578**,  
830 112-121 (2020).
- 831 6. Alexandrov, L. B. et al. Signatures of mutational processes in human cancer. *Nature* **500**,  
832 415-421 (2013).

- 833 7. Nik-Zainal, S. et al. Mutational processes molding the genomes of 21 breast cancers. *Cell*  
834 **149**, 979-993 (2012).
- 835 8. Menghi, F. et al. The Tandem Duplicator Phenotype Is a Prevalent Genome-Wide Cancer  
836 Configuration Driven by Distinct Gene Mutations. *Cancer Cell* **34**, 197-210.e5 (2018).
- 837 9. Zhang, C. Z. et al. Chromothripsis from DNA damage in micronuclei. *Nature* **522**, 179-184  
838 (2015).
- 839 10. Willis, N. A. et al. Mechanism of tandem duplication formation in BRCA1-mutant cells.  
840 *Nature* **551**, 590-595 (2017).
- 841 11. Maciejowski, J., Li, Y., Bosco, N., Campbell, P. J. & de Lange, T. Chromothripsis and  
842 Kataegis Induced by Telomere Crisis. *Cell* **163**, 1641-1654 (2015).
- 843 12. Ly, P. et al. Chromosome segregation errors generate a diverse spectrum of simple and  
844 complex genomic rearrangements. *Nat Genet* **51**, 705-715 (2019).
- 845 13. Ghezraoui, H. et al. Chromosomal translocations in human cells are generated by  
846 canonical nonhomologous end-joining. *Mol Cell* **55**, 829-842 (2014).
- 847 14. Umbreit, N. T. et al. Mechanisms generating cancer genome complexity from a single cell  
848 division error. *Science* **368**, (2020).
- 849 15. Shay, J. W. & Wright, W. E. Senescence and immortalization: role of telomeres and  
850 telomerase. *Carcinogenesis* **26**, 867-874 (2005).
- 851 16. Artandi, S. E. & DePinho, R. A. A critical role for telomeres in suppressing and facilitating  
852 carcinogenesis. *Curr Opin Genet Dev* **10**, 39-46 (2000).
- 853 17. Maciejowski, J. & de Lange, T. Telomeres in cancer: tumour suppression and genome  
854 instability. *Nat Rev Mol Cell Biol* (2017).
- 855 18. McClintock, B. The Behavior in Successive Nuclear Divisions of a Chromosome Broken at  
856 Meiosis. *Proc Natl Acad Sci U S A* **25**, 405-416 (1939).
- 857 19. Gisselsson, D. et al. Telomere dysfunction triggers extensive DNA fragmentation and  
858 evolution of complex chromosome abnormalities in human malignant tumors. *Proc Natl*  
859 *Acad Sci U S A* **98**, 12683-12688 (2001).
- 860 20. Li, Y. et al. Constitutional and somatic rearrangement of chromosome 21 in acute  
861 lymphoblastic leukaemia. *Nature* **508**, 98-102 (2014).
- 862 21. Artandi, S. E. et al. Telomere dysfunction promotes non-reciprocal translocations and  
863 epithelial cancers in mice. *Nature* **406**, 641-645 (2000).
- 864 22. O'Hagan, R. C. et al. Telomere dysfunction provokes regional amplification and deletion in  
865 cancer genomes. *Cancer Cell* **2**, 149-155 (2002).



- 866 23. Ding, Z. et al. Telomerase reactivation following telomere dysfunction yields murine  
867 prostate tumors with bone metastases. *Cell* **148**, 896-907 (2012).
- 868 24. Liddiard, K. et al. Sister chromatid, but not NHEJ-mediated inter-chromosomal telomere  
869 fusions, occur independently of DNA ligases 3 and 4. *Genome Res* **26**, 588-600 (2016).
- 870 25. Maciejowski, J. et al. APOBEC3-dependent kataegis and TREX1-driven chromothripsis  
871 during telomere crisis. *Nat Genet* (2020).
- 872 26. Cleal, K., Jones, R. E., Grimstead, J. W., Hendrickson, E. A. & Baird, D. M.  
873 Chromothripsis during telomere crisis is independent of NHEJ, and consistent with a  
874 replicative origin. *Genome Res* **29**, 737-749 (2019).
- 875 27. Bryan, T. M., Englezou, A., Gupta, J., Bacchetti, S. & Reddel, R. R. Telomere elongation  
876 in immortal human cells without detectable telomerase activity. *EMBO J* **14**, 4240-4248  
877 (1995).
- 878 28. Shay, J. W. & Wright, W. E. Quantitation of the frequency of immortalization of normal  
879 human diploid fibroblasts by SV40 large T-antigen. *Exp Cell Res* **184**, 109-118 (1989).
- 880 29. Counter, C. M. et al. Telomere shortening associated with chromosome instability is  
881 arrested in immortal cells which express telomerase activity. *Embo J* **11**, 1921-1929  
882 (1992).
- 883 30. Wala, J. A. et al. SvABA: genome-wide detection of structural variants and indels by local  
884 assembly. *Genome Res* **28**, 581-591 (2018).
- 885 31. Cameron, D. L. et al. GRIDSS: sensitive and specific genomic rearrangement detection  
886 using positional de Bruijn graph assembly. *Genome Res* **27**, 2050-2060 (2017).
- 887 32. Chavez, A. et al. Highly efficient Cas9-mediated transcriptional programming. *Nat Methods*  
888 **12**, 326-328 (2015).
- 889 33. Chiba, K. et al. Mutations in the promoter of the telomerase gene TERT contribute to  
890 tumorigenesis by a two-step mechanism. *Science* **357**, 1416-1420 (2017).
- 891 34. Baird, D. M., Rowson, J., Wynford-Thomas, D. & Kipling, D. Extensive allelic variation and  
892 ultrashort telomeres in senescent human cells. *Nat Genet* **33**, 203-207 (2003).
- 893 35. Capper, R. et al. The nature of telomere fusion and a definition of the critical telomere  
894 length in human cells. *Genes Dev* **21**, 2495-2508 (2007).
- 895 36. Riethman, H. et al. Mapping and initial analysis of human subtelomeric sequence  
896 assemblies. *Genome Res* **14**, 18-28 (2004).
- 897 37. Petljak, M. et al. Characterizing Mutational Signatures in Human Cancer Cell Lines  
898 Reveals Episodic APOBEC Mutagenesis. *Cell* **176**, 1282-1294.e20 (2019).



- 899 38. Smogorzewska, A., Karlseder, J., Holtgreve-Grez, H., Jauch, A. & de Lange, T. DNA  
900 Ligase IV-Dependent NHEJ of Deprotected Mammalian Telomeres in G1 and G2. *Curr*  
901 *Biol* **12**, 1635 (2002).
- 902 39. Letsolo, B. T., Rowson, J. & Baird, D. M. Fusion of short telomeres in human cells is  
903 characterized by extensive deletion and microhomology, and can result in complex  
904 rearrangements. *Nucleic Acids Res* **38**, 1841-1852 (2010).
- 905 40. Shay, J. W., Pereira-Smith, O. M. & Wright, W. E. A role for both RB and p53 in the  
906 regulation of human cellular senescence. *Exp Cell Res* **196**, 33-39 (1991).
- 907 41. d'Adda di Fagagna, F. et al. A DNA damage checkpoint response in telomere-initiated  
908 senescence. *Nature* **426**, 194-198 (2003).
- 909 42. Brown, J. P., Wei, W. & Sedivy, J. M. Bypass of senescence after disruption of  
910 p21CIP1/WAF1 gene in normal diploid human fibroblasts. *Science* **277**, 831-834 (1997).
- 911 43. Jacobs, J. J. & de Lange, T. Significant role for p16INK4a in p53-independent telomere-  
912 directed senescence. *Curr Biol* **14**, 2302-2308 (2004).
- 913 44. Furugori, E. et al. Telomere shortening in gastric carcinoma with aging despite telomerase  
914 activation. *J Cancer Res Clin Oncol* **126**, 481-485 (2000).
- 915 45. de Lange, T. et al. Structure and variability of human chromosome ends. *Mol Cell Biol* **10**,  
916 518-527 (1990).
- 917 46. Mehle, C., Ljungberg, B. & Roos, G. Telomere shortening in renal cell carcinoma. *Cancer*  
918 *Res* **54**, 236-241 (1994).
- 919 47. Barthel, F. P. et al. Systematic analysis of telomere length and somatic alterations in 31  
920 cancer types. *Nat Genet* **49**, 349-357 (2017).
- 921 48. Stimpson, K. M. et al. Telomere disruption results in non-random formation of de novo  
922 dicentric chromosomes involving acrocentric human chromosomes. *PLoS Genet* **6**, (2010).
- 923 49. Chicas, A. et al. Dissecting the unique role of the retinoblastoma tumor suppressor during  
924 cellular senescence. *Cancer Cell* **17**, 376-387 (2010).
- 925 50. Doksani, Y. & de Lange, T. Telomere-Internal Double-Strand Breaks Are Repaired by  
926 Homologous Recombination and PARP1/Lig3-Dependent End-Joining. *Cell Rep* **17**, 1646-  
927 1656 (2016).
- 928 51. Schindelin, J. et al. Fiji: an open-source platform for biological-image analysis. *Nat*  
929 *Methods* **9**, 676-682 (2012).
- 930 52. Brown, W. R. et al. Structure and polymorphism of human telomere-associated DNA. *Cell*  
931 **63**, 119-132 (1990).

- 932 53. Li, H. & Durbin, R. Fast and accurate short read alignment with Burrows-Wheeler  
933 transform. *Bioinformatics* **25**, 1754-1760 (2009).
- 934 54. Wala, J. A. et al. SvABA: genome-wide detection of structural variants and indels by local  
935 assembly. *Genome Res* **28**, 581-591 (2018).
- 936 55. Deshpande, A., Walradt, T., Hu, Y., Koren, A. & Imielinski, M. Robust foreground detection  
937 in somatic copy number data. *bioRxiv* 847681 (2019).
- 938 56. Wala, J. & Beroukhim, R. SeqLib: a C++ API for rapid BAM manipulation, sequence  
939 alignment and sequence assembly. *Bioinformatics* **33**, 751-753 (2017).
- 940 57. Li, H. Exploring single-sample SNP and INDEL calling with whole-genome de novo  
941 assembly. *Bioinformatics* **28**, 1838-1844 (2012).
- 942 58. Li, H. Toward better understanding of artifacts in variant calling from high-coverage  
943 samples. *Bioinformatics* **30**, 2843-2851 (2014).
- 944 59. Kim, S. et al. Strelka2: fast and accurate calling of germline and somatic variants. *Nat*  
945 *Methods* **15**, 591-594 (2018).
- 946 60. Carter, S. L. et al. Absolute quantification of somatic DNA alterations in human cancer. *Nat*  
947 *Biotechnol* **30**, 413-421 (2012).
- 948
- 949
- 950

951 **Figure Legends**

952

953 **Figure 1. Genomic complexity after spontaneous telomerase activation**

954 **A)** CIRCOS plots showing seven cell lines that emerged spontaneously from telomere crisis  
955 (Supplementary Table 1), four of which show one or more clusters of complex gains. Binned  
956 purity- and ploidy-transformed read depth is shown in the periphery, with colored links in the  
957 center representing variant (rearrangement) junctions. A series of red colors is used to show  
958 junctions and read depth bins belonging to distinct clusters of complex gains in each cell line.  
959 Additional colors describe junctions and bins, including those belonging to simple losses and  
960 gains. See Methods for additional details regarding junction and bin classifications.

961 **B)** An example of a complex gain cluster in cell line BFT3B, spanning six discontinuous regions  
962 across five chromosomes, including a focus of high-level amplification amplifying telomeric  
963 portions of chr. 20p to 15 copies. Bottom track showing binned purity- and ploidy- transformed  
964 read-depth, with the top track showing the associated junction-balanced genome graph (see  
965 Methods<sup>3</sup>) with y-axis representing units of per cell copy number (CN) across bins and graph  
966 nodes (i.e. intervals). Gray and colored edges represent reference and variant junctions,  
967 respectively. Blue edges represent loose ends (see Methods for further details). Bins and  
968 junctions are colored as in panel A.

969 **C)** Read depth and junction patterns at the *TERT* locus across the seven post-crisis clones.  
970 Each track shows binned purity- and ploidy-transformed read depth in units of CN, with variant  
971 (rearrangement) junctions and loose ends plotted as red arcs. The bottom track highlights the  
972 *TERT* gene among genes on chromosome 5p15. Violin plots to the left of tracks show the  
973 genome-wide distribution of read depth in units of CN, demonstrating that 6 of 7 clones have  
974 elevated CN at the *TERT* locus.

975

976 **Figure 2. An *in vitro* system for telomerase-mediated escape from natural telomere crisis**

977 **A)** Immunoblot for dCas9-VPR (using a Cas9 Ab) in MRC5/Rbsh/p21sh/iCRISPRa-TERT cells  
978 with or without doxycycline treatment for 96 h (see also Supplementary Figure 2A-B).

979 **B)** qPCR of TERT mRNA expression in RPE1, HCT116, U2OS and  
980 MRC5/Rbsh/p21sh/iCRISPRa-TERT cells with and without doxycycline treatment. Values are  
981 normalized to  $\beta$ -actin mRNA. Data from 3 independent biological replicates; error bars show  
982 means  $\pm$ SDs.

983 **C)** TRAP assay on extracts from MRC5 and MRC5/Rbsh/p21sh/iCRISPRa-TERT cells with and  
984 without doxycycline treatment for indicated time periods. HCT116 and 293T (Phoenix) cells are  
985 included as positive controls.

986 **D)** Growth curve of parental MRC5 cells, MRC5/Rbsh/p21sh cells, and  
987 MRC5/Rbsh/p21sh/iCRISPRa-TERT cells grown with and without doxycycline. Arrows indicate  
988 when each construct was introduced. Days in culture represents total time in culture from  
989 parental MRC5 cells to late passage MRC5/Rbsh/p21sh/iCRISPRa-TERT cells. Time points for  
990 telomere analysis (presented in Figure 3) and the approximate onset of senescence in the  
991 parental MRC5 cells are indicated.

992 **E)** STELA of XpYp telomeres in MRC5/Rbsh/p21sh/iCRISPRa-TERT cells with or without  
993 doxycycline treatment at 70 and 150 days of culture.

994 **F)** Quantification of band intensity in E, with background signal subtracted. Data from two  
995 independent biological experiments is shown (see also Supplementary Figure 2D). Biological  
996 replicates represent cells at approximately the same days in culture ( $\pm 5$  days).

997 **G)** Genomic blot of telomeric *Mbol*/*Afl* fragments in MRC5/Rbsh/p21sh/iCRISPRa-TERT cells  
998 grown with or without doxycycline at the indicated time points.

999

### 1000 **Figure 3. Dissipating telomere crisis in MRC5/Rbsh/p21sh/iCRISPRa-TERT cells**

1001 **A)** Metaphase spreads from MRC5/Rbsh/p21sh/iCRISPRa-TERT cells with and without  
1002 doxycycline at day 95. Telomeres are detected with a telomeric repeat PNA probe (TelG, red)  
1003 and centromeres are detected with a probe for CENPB (green). DNA was stained with DAPI  
1004 (gray). Chromosome fusions are indicated by white arrowheads.

1005 **B)** Quantification of percentage of metaphase spreads with at least one fusion after the  
1006 indicated days of continuous culture for MRC5/Rbsh/p21sh/iCRISPRa-TERT cells with and  
1007 without doxycycline. Error bars indicate means and SDs from three independent biological  
1008 replicates. *P* values were determined with an unpaired student's t-test; ns, significant, \*,  $p < 0.05$   
1009 (see also Supplementary Figure 3A).

1010 **C)** Gel showing products of telomere fusion PCR on MRC5/Rbsh/p21sh/iCRISPRa-TERT cells  
1011 cultured with and without doxycycline for the indicated time. Each lane represents an  
1012 independent replicate PCR reaction. Telomere fusion products are detected by hybridization  
1013 with a probe for the 21q telomere (see Methods) and the control XpYp PCR product is detected  
1014 with Ethidium bromide staining.

1015 **D)** Quantification of the number of telomere fusion products per haploid genome using the  
1016 assay shown in panel C. Each dot represents a single PCR reaction. Reactions from two

1017 independent biological replicates are shown. *P* values were determined as in panel B. \*\*, *p*  
1018 <0.01.

1019 **E)** Detection of micronuclei (arrowheads) and DNA damage foci using indirect  
1020 immunofluorescence for 53BP1 (red) in the indicated cells. DNA is stained with DAPI (blue).

1021 **F)** Quantification of percentage of cells with  $\geq 10$  53BP1 foci at the indicated time points. Data  
1022 show the means from 3 independent biological replicates with SDs. *P* values as above.

1023 **G)** Quantification of percentage of cells with micronuclei after indicated days in culture. Data  
1024 show the means from 3 independent biological replicates with SDs. *P* values as above.

1025

#### 1026 **Figure 4. Genomic screening of post-crisis clones**

1027 **A)** Growth curve of MRC5/Rbsh/p21sh/iCRISPRa-TERT cells with and without doxycycline,  
1028 indicating the time points at which single cell clones were derived (day 120 and day 150).

1029 **B)** Circular heatmap showing genome-wide binned purity- and ploidy- transformed read depth  
1030 (in units of CN across 118 low pass WGS-profiled clones. Heatmap rows correspond to  
1031 concentric rings in the heatmap. Clones are clustered with respect to genome-wide copy  
1032 number profile similarity (see Methods).

1033 **C)** Zoomed in portion of chromosomes 12 and 21 that underwent copy number alterations in a  
1034 majority of the clones, clustered based on their coverage across these regions. Clusters are  
1035 named with respect to their consensus copy number pattern, and on the basis of high depth  
1036 WGS analyses presented in Figure 5. Chromosome 21 gain *n*=6 clones, unrearranged *n*=38,  
1037 chromothripsis-like *n*=1, arm loss *n*=6, early BFB-like *n*=20, BFB-like *n*=47.

1038

#### 1039 **Figure 5. High-resolution reconstruction and lineage of post-crisis genomes**

1040 **A)** SNV-based phylogeny inferred across 13 high-depth WGS clones and heatmap of variant  
1041 allele fractions (VAF) for SNVs detected among two or more clones. For simplicity, private SNVs  
1042 (those found only in a single clone) are not shown.

1043 **B)** Heatmap of chromosome 12p copy numbers and variant junction patterns in chromosome 12  
1044 (see text and Methods).

1045 **C)** Tree showing distinct trajectories of structural variant evolution following 12p attrition and  
1046 subsequent telomere crisis. Each terminal node in the tree is associated with a unique 12p  
1047 profile comprising a representative binned read depth pattern (bottom track) from one or more  
1048 clones mapping to an identical junction-balanced genome graph (second track from bottom).  
1049 The top track in each profile represents a reconstruction of the rearranged allele. Each allele is  
1050 a walk of genomic intervals and reference/variant junctions that, in combination with an

1051 unarranged 12p allele (not shown), sums to the observed genome graph (see Methods). Two  
1052 distinct arrows linking Y11 and Y15 demonstrate that these clones are distinct lineages (based  
1053 on divergent SNV patterns, see panel A), that converge to identical WGS 12p CN profiles  
1054 (although with likely distinct breakpoints inside the 12p centromere unmappable by WGS, see  
1055 text).

1056

### 1057 **Figure 6. Resolution of BFB cycles in telomere crisis**

1058 **A)** DAPI banded karyotype of post-crisis clone Z43 and Y8 showing a rearranged chromosome  
1059 12 and loss of one copy of chromosome 21. Red star: Marker chromosome 12. Dashed gray  
1060 box: absence of 21. (See also Supplementary Figure 6A).

1061 **B)** Representative metaphase spreads of clone Z43 and Y8 hybridized with whole chromosome  
1062 paints for chromosomes 12 (green) and 21 (red). DNA was stained with DAPI (gray). Insets  
1063 show enlarged images of the 12-21 derivative marker chromosome, and intact copies of the  
1064 sister alleles (see also Supplementary Figure 6B).

1065 **C)** Images of chromosome 12 from representative clones from each branch of the evolution of  
1066 chromosome 12 post-crisis (according to the analysis in Figure 5C). Metaphases were  
1067 hybridized with whole chromosome 12 paint. DNA was stained with DAPI (gray).

1068

### 1069 **Figure 7. Telomere attrition renders an allele of 12p vulnerable**

1070 **A)** Genomic track plots of parental alleles phased into lost (“L”) and retained (“R”) haplotypes  
1071 (see Methods) on chromosome 12p of clone Y11.

1072 **B)** Scatter plot showing purity- and ploidy-transformed L and R haplotype specific allelic read  
1073 depth across 12p segments in high pass WGS-profiled post-crisis clones.

1074 **C)** Genomic track plots of allelic read counts on the L and R allele of clones Y8 and Z43, two  
1075 post-crisis clones that independently acquired structural variants on an otherwise unarranged  
1076 chromosome 12p allele.

1077 **D)** Metaphase spreads of early passage MRC5 cells, hybridized with BAC probes to  
1078 chromosome 12 (green) and either chromosome 6 or 18 (red), as well as a PNA probe for TelG  
1079 (yellow). Insets of white-boxed chromosomes are shown with each channel individually.

1080 **E)** Quantification of the relative length of the shortest 12p telomere. Each dot shows the median  
1081 ratio of the TelG signal of the shortest telomeres of the indicated chromosome arm to all other  
1082 telomeres in each metaphase spread. Violin plots show data from all telomeres analyzed.  
1083 Chromosome 12 was identified using a specific BAC probe (Chr.12p11.2) in 79 metaphase  
1084 spreads with a total of 3992 telomeres. Chromosome 6 and 18 were identified based on BAC



1085 probe hybridization (Chr.6p21.2~21.3, Chr.18q12.3~21.1) in 53 and 28 metaphases,  
1086 respectively (2629 and 1497 telomeres, respectively). Chromosome 21 was identified from  
1087 DAPI banding patterns in 36 metaphases (1757 telomeres). *P* values were derived from an  
1088 unpaired Students t-test, \*,  $p < 0.05$ , \*\*\*\*,  $p < 0.0001$ . See Methods.

1089 **F)** Dicentric chromosomes containing chromosome 12 in telomere crisis. Metaphase spreads  
1090 from MRC5/Rbsh/p21sh/iCRISPRa-TERT cells with doxycycline at day 90 (during crisis) were  
1091 hybridized with a BAC probe for Chr.12p11.2 (red) and a CENPB PNA probe (green) to identify  
1092 centromeres. A full spread is shown with white box inset zoom in. Further examples from other  
1093 spreads are also shown. See also Supplementary Figure 7B.

1094

1095

## 1096 **Supplementary Figure Legends**

1097

1098 **Supplementary Figure 1. Complex gains and telomerase restoration after spontaneous**  
1099 **telomere crisis resolution. Related to Figure 1.**

1100 **A)** TRAP assay showing telomerase activity in SV40 immortalized clones SW13, SW26 and  
1101 SW39. MRC5 is included as a negative control, and HCT116 as a positive control. TSR8 is the  
1102 positive control template.

1103 **B-C)** Example clusters of complex gains across the cell lines shown in Figure 1A, each showing  
1104 binned purity- and ploidy- transformed read-depth, with the top track showing the associated  
1105 junction-balanced genome graph (see Methods, <sup>3</sup>, with y-axis representing units of per cell copy  
1106 number (CN) across bins and graph nodes (i.e. intervals). Gray and colored edges represent  
1107 reference and variant junctions, respectively. Blue edges represent loose ends (see Methods  
1108 for further details). Bins and junctions are colored as per Figure 1A.

1109

1110 **Supplementary Figure 2. Controlled system for crisis escape. Related to Figure 2.**

1111 **A)** Immunoblot for Rb and 21 in MRC5 cells and MRC5/Rbsh/p21sh cells.

1112 **B)** Schematic diagram illustrating the iCRISPRa-TERT system. The positions of the *TERT*  
1113 activating gRNAs relative to the transcriptional start site (TSS) of the *TERT* gene are shown.

1114 **C)** qPCR for *TTN* control gene, activated with a combination of four sgRNAs in  
1115 MRC5/Rbsh/p21sh iCRISPRa cells (with or without dox, 96 hrs). HCT116, RPE1-hTERT and  
1116 U2OS cells are included as negative controls. Data are from three independent biological  
1117 replicates.

1118 **D)** STELA of the XpYp telomere in MRC5/Rbsh/p21sh/iCRISPRa-TERT cells after 70 days or  
1119 150 days of continuous culture with or without doxycycline. This is a biological replicate of the  
1120 STELA in Figure 2E.

1121

1122 **Supplementary Figure 3. Telomere fusions after controlled escape from crisis. Related**  
1123 **to Figure 3.**

1124 **A)** Quantification of percentage of fused chromosomes after the indicated days of continuous  
1125 culture for MRC5/Rbsh/p21sh/iCRISPRa-TERT cells with and without doxycycline. Data  
1126 represent means and SDs for three independent biological replicates. *P* values derived from an  
1127 unpaired Student's t-test. ns, not significant; \*\*,  $p < 0.01$ ; \*\*\*,  $p < 0.001$ .

1128

1129 **Supplementary Figure 4. Post-crisis telomere dynamics. Related to Figure 4.**

1130 **A)** Products of telomere fusion PCR on a panel of post-crisis clones (See Figure 4A). Telomere  
1131 fusions are detected by hybridization to the 21q probe. The control XpYp band is detected with  
1132 Ethidium bromide staining.

1133 **B)** STELA products from a panel of post-crisis clones from both time points.

1134 **C)** Telomeric blot on DNA from MRC5 cells and a panel of post-crisis clones from both time  
1135 points.

1136 **D)** TRAP assay showing telomerase activity in MRC5/Rbsh/p21sh/iCRISPRa-TERT treated with  
1137 doxycycline for the indicated number of days and a selection of post-crisis clones from the day  
1138 150 timepoint. HCT116 is included as a positive control.

1139 **E)** TRAP assay showing robust telomerase activity in MRC5 cells infected with retroviral pLVX-  
1140 hTERT.

1141 **F)** Circular heatmap showing genome-wide binned purity- and ploidy- transformed read depth  
1142 (in units of CN across 8 low pass WGS-profiled control CT clones). Heatmap rows correspond  
1143 to concentric rings in the heatmap.

1144

1145 **Supplementary Figure 5. WGS analysis showing genome alterations post crisis clones.**  
1146 **Related to Figure 4 and 5.**

1147 **A)** Consensus copy number profile of 47 complex low pass WGS clones targeting chromosome  
1148 12p.

1149 **B)** Rainfall plot demonstrating SNV patterns as a function of GC vs AT reference nucleotide  
1150 context, with y-axis showing the logarithm of the inter SNV distance. Highlighted region



1151 represents a GC strand coordinated cluster that is found across all four clones in the BFB  
1152 cluster which harbor junction j2.

1153 **C)** Junction supporting read pairs and corresponding drop in coverage at the small deletion on  
1154 chromosome 12q in representative BFB-like (Z43), chromothripsis-like (Y8), close-relative Y15,  
1155 and lack of such evidence in distant Y11.

1156 **D)** Detailed JaBbA models and linear allele reconstruction at two distinct loose ends, e2 and e3.

1157

1158 **Supplementary Figure 6. Karyotype evolution in post-crisis clones. Related to Figure 6.**

1159 **A)** DAPI banded karyotypes from the MRC5 parental cell line and a selection of post-crisis  
1160 clones. Marker chromosomes (chromosome 12) are indicated with a red star. Dashed box  
1161 indicates the absence of an intact copy of chromosome 21.

1162 **B)** Representative images of a metaphase spreads from clones Z41 and Z29 hybridized with  
1163 both 12 (green) or 21 (red) chromosome paints. DNA stained with DAPI (gray).

1164

1165 **Supplementary Figure 7. Chromosome 12p allelic imbalance. Related to Figure 7.**

1166 **A)** Scatter plot showing purity- and ploidy-transformed L and R haplotype specific allelic read  
1167 depth across 12p segments in low pass WGS-profiled post-crisis clones.

1168 **B)** Analysis showing that 12p, 6p and 18p arms contain the shortest telomere of those  
1169 chromosomes. Comparison of the shortest (S) telomere end from each arm (p or q) to each  
1170 other allele of that chromosome (i.e. q-short allele vs. p-short allele) across chromosome 12, 6  
1171 and 18 alleles. Ratio of telomeric intensity from TelG hybridization, as in Figure 7D (S= short  
1172 allele, L= long allele, based on TelG intensity). Error bars show median and interquartile ranges.  
1173 Chromosome 12: n= 49 cells, chr.18: n=27, chr.6: n= 22.

1174 **C)** Fraction of dicentric or multicentric chromosomes containing 12p in  
1175 MRC5/Rbsh/p21sh/iCRISPRa-TERT cells in crisis (with doxycycline at day 90) among all  
1176 dicentric and multicentric chromosomes. Based on analysis of images as in Figure 7E. n=81  
1177 metaphases scored from two independent experiments.

1178

1179 **Supplementary Table Legends**

1180

1181 **Supplementary Table 1: SV40T post-crisis cell lines. Related to Figure 1.**

1182 Description of the SV40T immortalized cell lines used in this study (See Figure 1). Details of  
1183 parental cell line, telomerase status and references are shown.

1184

## Dewhurst, Yao *et al.* Figure 1

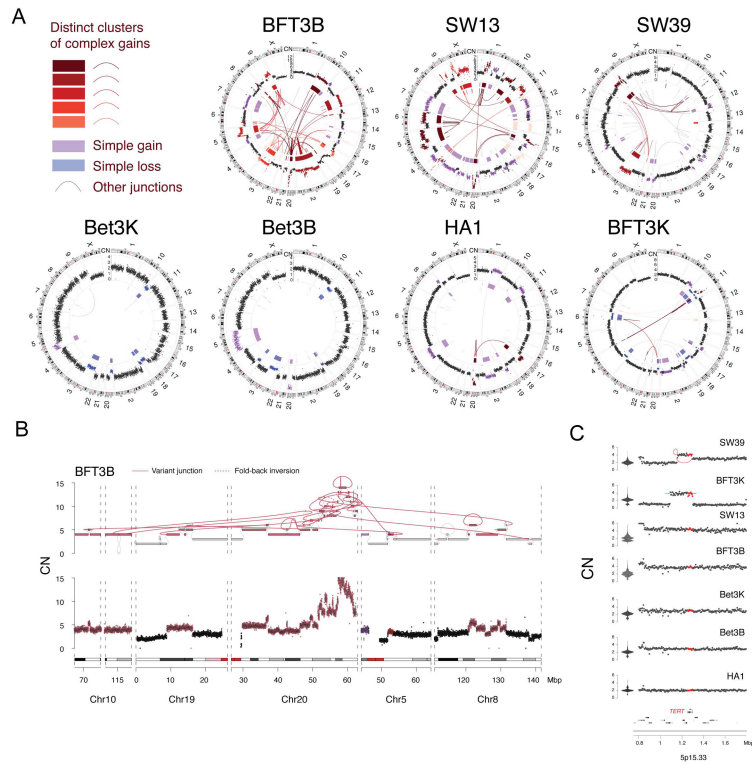

### Figure 1. Genomic complexity after spontaneous telomerase activation

**A)** CIRCOS plots showing seven cell lines that emerged spontaneously from telomere crisis (Supplementary Table 1), four of which show one or more clusters of complex gains. Binned purity- and ploidy-transformed read depth is shown in the periphery, with colored links in the center representing variant (rearrangement) junctions. A series of red colors is used to show junctions and read depth bins belonging to distinct clusters of complex gains in each cell line. Additional colors describe junctions and bins, including those belonging to simple losses and gains. See Methods for additional details regarding junction and bin classifications. **B)** An example of a complex gain cluster in cell line BFT3B, spanning six discontinuous regions across five chromosomes, including a focus of high-level amplification amplifying telomeric portions of chr. 20p to 15 copies. Bottom track showing binned purity- and ploidy-transformed read depth, with the top track showing the associated junction-balanced genome graph (see Methods<sup>3</sup>) with y-axis representing units of per cell copy number (CN) across bins and graph nodes (i.e. intervals). Gray and colored edges represent reference and variant junctions, respectively. Blue edges represent loose ends (see Methods for further details). Bins and junctions are colored as in panel A. **C)** Read depth and junction patterns at the *TERT* locus across the seven post-crisis clones. Each track shows binned purity- and ploidy-transformed read depth in units of CN, with variant (rearrangement) junctions and loose ends plotted as red arcs. The bottom track highlights the *TERT* gene among genes on chromosome 5p15. Violin plots to the left of tracks show the genome-wide distribution of read depth in units of CN, demonstrating that 6 of 7 clones have elevated CN at the *TERT* locus.

## Dewhurst, Yao *et al.* Figure 2

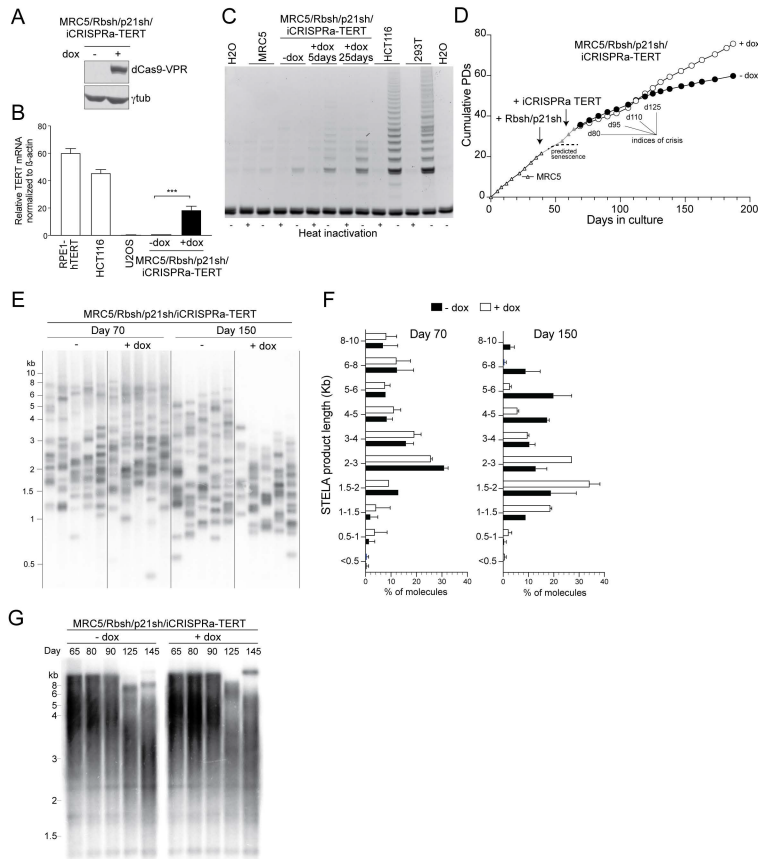

**Figure 2. An *in vitro* system for telomerase-mediated escape from natural telomere crisis**

**A)** Immunoblot for dCas9-VPR (using a Cas9 Ab) in MRC5/Rbsh/p21sh/iCRISPRa-TERT cells with or without doxycycline treatment for 96 h (see also Supplementary Figure 2A-B). **B)** qPCR of TERT mRNA expression in RPE1, HCT116, U2OS and MRC5/Rbsh/p21sh/iCRISPRa-TERT cells with and without doxycycline treatment. Values are normalized to  $\beta$ -actin mRNA. Data from 3 independent biological replicates; error bars show means  $\pm$ SDs. **C)** TRAP assay on extracts from MRC5 and MRC5/Rbsh/p21sh/iCRISPRa-TERT cells with and without doxycycline treatment for indicated time periods. HCT116 and 293T (Phoenix) cells are included as positive controls. **D)** Growth curve of parental MRC5 cells, MRC5/Rbsh/p21sh cells, and MRC5/Rbsh/p21sh/iCRISPRa-TERT cells grown with and without doxycycline. Arrows indicate when each construct was introduced. Days in culture represents total time in culture from parental MRC5 cells to late passage MRC5/Rbsh/p21sh/iCRISPRa-TERT cells. Time points for telomere analysis (presented in Figure 3) and the approximate onset of senescence in the parental MRC5 cells are indicated. **E)** STELA of XpYp telomeres in MRC5/Rbsh/p21sh/iCRISPRa-TERT cells with or without doxycycline treatment at 70 and 150 days of culture. **F)** Quantification of band intensity in E, with background signal subtracted. Data from two independent biological experiments is shown (see also Supplementary Figure 2D). Biological replicates represent cells at approximately the same days in culture ( $\pm$  5 days). **G)** Genomic blot of telomeric *Mbol/AIul* fragments in MRC5/Rbsh/p21sh/iCRISPRa-TERT cells grown with or without doxycycline at the indicated time points.

### Dewhurst, Yao *et al.* Figure 3

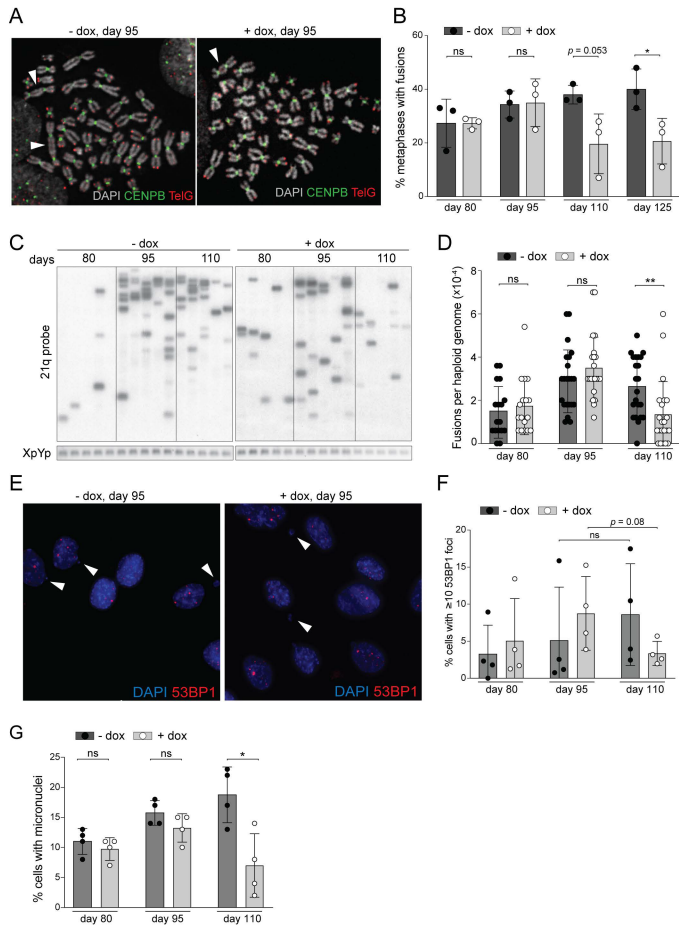

#### Figure 3. Dissipating telomere crisis in MRC5/Rbsh/p21sh/iCRISPRa-TERT cells

**A)** Metaphase spreads from MRC5/Rbsh/p21sh/iCRISPRa-TERT cells with and without doxycycline at day 95. Telomeres are detected with a telomeric repeat PNA probe (TelG, red) and centromeres are detected with a probe for CENPB (green). DNA was stained with DAPI (gray). Chromosome fusions are indicated by white arrowheads. **B)** Quantification of percentage of metaphase spreads with at least one fusion after the indicated days of continuous culture for MRC5/Rbsh/p21sh/iCRISPRa-TERT cells with and without doxycycline. Error bars indicate means and SDs from three independent biological replicates. *P* values were determined with an unpaired student's *t*-test; ns, significant, \*,  $p < 0.05$  (see also Supplementary Figure 3A). **C)** Gel showing products of telomere fusion PCR on MRC5/Rbsh/p21sh/iCRISPRa-TERT cells cultured with and without doxycycline for the indicated time. Each lane represents an independent replicate PCR reaction. Telomere fusion products are detected by hybridization with a probe for the 21q telomere (see Methods) and the control XpYp PCR product is detected with Ethidium bromide staining. **D)** Quantification of the number of telomere fusion products per haploid genome using the assay shown in panel C. Each dot represents a single PCR reaction. Reactions from two independent biological replicates are shown. *P* values were determined as in panel B. \*\*,  $p < 0.01$ . **E)** Detection of micronuclei (arrowheads) and DNA damage foci using indirect immunofluorescence for 53BP1 (red) in the indicated cells. DNA is stained with DAPI (blue). **F)** Quantification of percentage of cells with  $\geq 10$  53BP1 foci at the indicated time points. Data show the means from 3 independent biological replicates with SDs. *P* values as above. **G)** Quantification of percentage of cells with micronuclei after indicated days in culture. Data show the means from 3 independent biological replicates with SDs. *P* values as above.

## Dewhurst, Yao *et al.* Figure 4

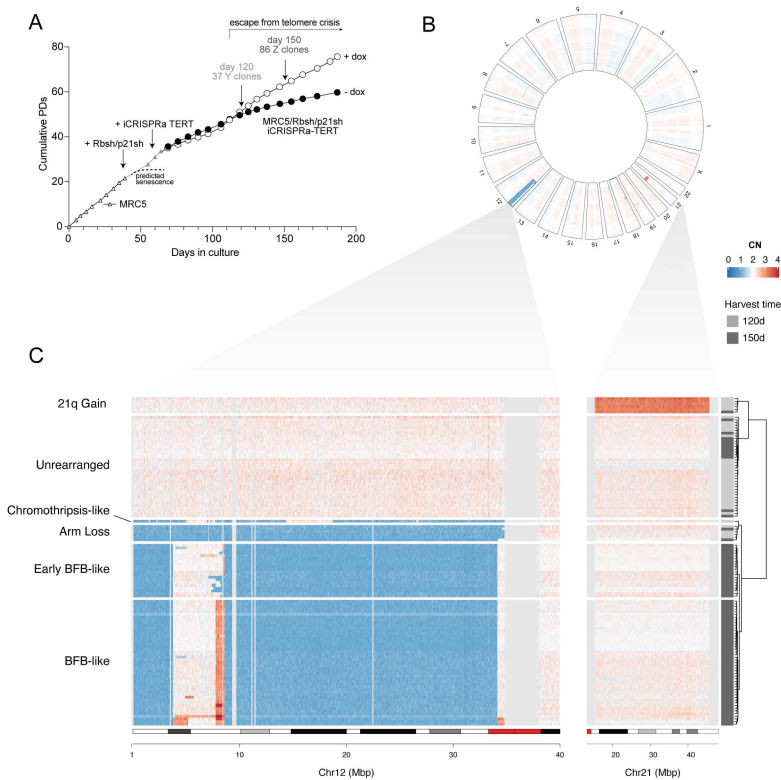

### Figure 4. Genomic screening of post-crisis clones

**A)** Growth curve of MRC5/Rbsh/p21sh/iCRISPRa-TERT cells with and without doxycycline, indicating the time points at which single cell clones were derived (day 120 and day 150). **B)** Circular heatmap showing genome-wide binned purity- and ploidy-transformed read depth (in units of CN across 118 low pass WGS-profiled clones). Heatmap rows correspond to concentric rings in the heatmap. Clones are clustered with respect to genome-wide copy number profile similarity (see Methods). **C)** Zoomed in portion of chromosomes 12 and 21 that underwent copy number alterations in a majority of the clones, clustered based on their coverage across these regions. Clusters are named with respect to their consensus copy number pattern, and on the basis of high depth WGS analyses presented in Figure 5. Chromosome 21 gain n=6 clones, unrearranged n=38, chromothripsis-like n=1, arm loss n=6, early BFB-like n=20, BFB-like n=47.



## Dewhurst, Yao *et al.* Figure 5

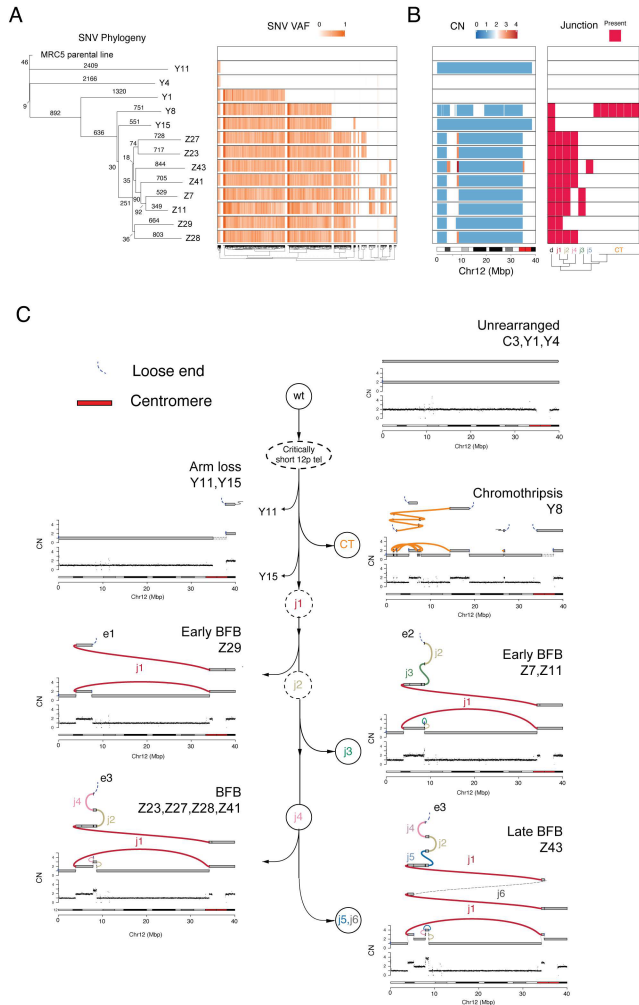

### Figure 5. High-resolution reconstruction and lineage of post-crisis genomes

**A)** SNV-based phylogeny inferred across 13 high-depth WGS clones and heatmap of variant allele fractions (VAF) for SNVs detected among two or more clones. For simplicity, private SNVs (those found only in a single clone) are not shown. **B)** Heatmap of chromosome 12p copy numbers and variant junction patterns in chromosome 12 (see text and Methods). **C)** Tree showing distinct trajectories of structural variant evolution following 12p attrition and subsequent telomere crisis. Each terminal node in the tree is associated with a unique 12p profile comprising a representative binned read depth pattern (bottom track) from one or more clones mapping to an identical junction-balanced genome graph (second track from bottom). The top track in each profile represents a reconstruction of the rearranged allele. Each allele is a walk of genomic intervals and reference/variant junctions that, in combination with an unrearranged 12p allele (not shown), sums to the observed genome graph (see Methods). Two distinct arrows linking Y11 and Y15 demonstrate that these clones are distinct lineages (based on divergent SNV patterns, see panel A), that converge to identical WGS 12p CN profiles (although with likely distinct breakpoints inside the 12p centromere unmappable by WGS, see text).



Dewhurst, Yao *et al.* Figure 6

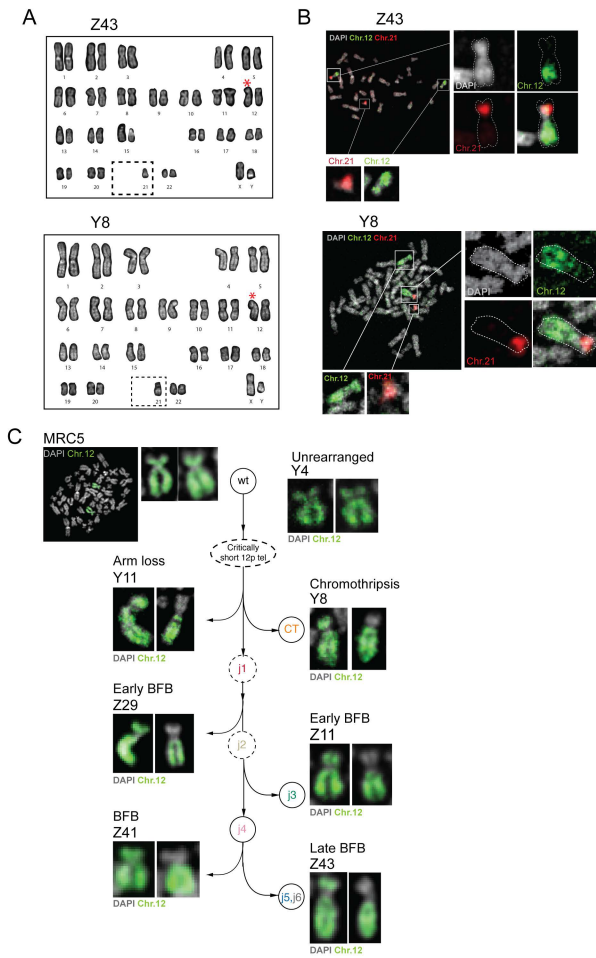

**Figure 6. Resolution of BFB cycles in telomere crisis**

**A)** DAPI banded karyotype of post-crisis clone Z43 and Y8 showing a rearranged chromosome 12 and loss of one copy of chromosome 21. Red star: Marker chromosome 12. Dashed gray box: absence of 21. (See also Supplementary Figure 6A). **B)** Representative metaphase spreads of clone Z43 and Y8 hybridized with whole chromosome paints for chromosomes 12 (green) and 21 (red). DNA was stained with DAPI (gray). Insets show enlarged images of the 12-21 derivative marker chromosome, and intact copies of the sister alleles (see also Supplementary Figure 6B). **C)** Images of chromosome 12 from representative clones from each branch of the evolution of chromosome 12 post-crisis (according to the analysis in Figure 5C). Metaphases were hybridized with whole chromosome 12 paint. DNA was stained with DAPI (gray).

## Dewhurst, Yao *et al.* Figure 7

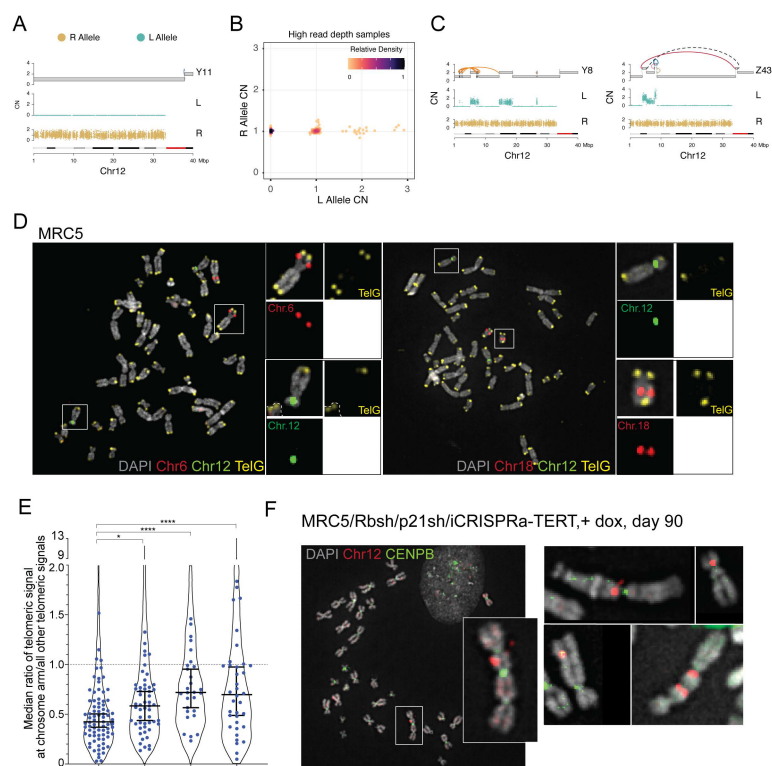

### Figure 7. Telomere attrition renders an allele of 12p vulnerable

**A)** Genomic track plots of parental alleles phased into lost (“L”) and retained (“R”) haplotypes (see Methods) on chromosome 12p of clone Y11. **B)** Scatter plot showing purity- and ploidy-transformed L and R haplotype specific allelic read depth across 12p segments in high pass WGS-profiled post-crisis clones. **C)** Genomic track plots of allelic read counts on the L and R allele of clones Y8 and Z43, two post-crisis clones that independently acquired structural variants on an otherwise unrearranged chromosome 12p allele. **D)** Metaphase spreads of early passage MRC5 cells, hybridized with BAC probes to chromosome 12 (green) and either chromosome 6 or 18 (red), as well as a PNA probe for TelG (yellow). Insets of white-boxed chromosomes are shown with each channel individually. **E)** Quantification of the relative length of the shortest 12p telomere. Each dot shows the median ratio of the TelG signal of the shortest telomeres of the indicated chromosome arm to all other telomeres in each metaphase spread. Violin plots show data from all telomeres analyzed. Chromosome 12 was identified using a specific BAC probe (Chr.12p11.2) in 79 metaphase spreads with a total of 3992 telomeres. Chromosome 6 and 18 were identified based on BAC probe hybridization (Chr.6p21.2~21.3, Chr.18q12.3~21.1) in 53 and 28 metaphases, respectively (2629 and 1497 telomeres, respectively). Chromosome 21 was identified from DAPI banding patterns in 36 metaphases (1757 telomeres). *P* values were derived from an unpaired Students *t*-test, \*, *p* < 0.05, \*\*\*\*, *p* < 0.0001. See Methods. **F)** Dicentric chromosomes containing chromosome 12 in telomere crisis. Metaphase spreads from MRC5/Rbsh/p21sh/iCRISPRa-TERT cells with doxycycline at day 90 (during crisis) were hybridized with a BAC probe for Chr.12p11.2 (red) and a CENPB PNA probe (green) to identify centromeres. A full spread is shown with white box inset zoom in. Further examples from other spreads are also shown. See also Supplementary Figure 7B.
